# Supplementary material for: A Survey of Strategies to Modulate the Bone Morphogenetic Protein Signaling Pathway: Current and Future Perspectives
Source: PubMed Central journal article supplement (PMC4940573; doi:10.1155/2016/7290686), 2016-06-28
Supplement: 7290686.f1.pdf [file 7290686.f1.pdf]

**Table S1.** Examples of BMP pathway modulation for orthopedic and dental applications.

| Application                                    | Agent         | Technique      | Modifier                |                    | Reference    |
|------------------------------------------------|---------------|----------------|-------------------------|--------------------|--------------|
|                                                |               |                | Agent                   | Effect of Modifier |              |
| Articular Cartilage and Meniscal Repair        | BMP2          | Gene Transfer  | Periosteal Cells        | ND                 | [1]          |
|                                                |               |                | Chondrocytes            | ND                 | [2]          |
|                                                |               |                | Sox9 + Chondrocytes     | ND                 | [3]          |
|                                                | BMP4          | Gene Transfer  | None                    | NA                 | [4]          |
|                                                |               |                | ASCs                    | ND                 | [5]          |
|                                                |               |                | MDSCs                   | ND                 | [6]          |
|                                                |               |                | sFLT1 + PRP and MDSCs   | Enhance            | [7]          |
|                                                | BMP6          | Recombinant    | ASCs                    | ND                 | [8]          |
|                                                | BMP7          | Recombinant    | None                    | NA                 | [9, 10]      |
|                                                |               | Gene Transfer  | Periosteal Cells        | ND                 | [11]         |
| Bone Augmentation / Grafting / Fracture Repair | AB204         | Recombinant    | None                    | NA                 | [12]         |
|                                                | caALK2        | Gene Transfer  | None                    | NA                 | [13]         |
|                                                | caALK6        | Gene Transfer  | Runx2                   | ND                 | [14]         |
|                                                | BB1           | Recombinant    | None                    | NA                 | [15]         |
|                                                | BMP2          | Recombinant    | None                    | NA                 | [12, 15-136] |
|                                                |               |                | Alendronate             | Enhance            | [137]        |
|                                                |               |                | Antibiotic              | Enhance            | [138]        |
|                                                |               |                | ASCs                    | ND                 | [139]        |
|                                                |               |                |                         | No Change          | [140]        |
|                                                |               |                | BMP2-L51P               | Enhance            | [84]         |
|                                                |               |                | BMSCs                   | Enhance            | [141-144]    |
|                                                |               |                |                         | ND                 | [145]        |
|                                                |               |                |                         | No Change          | [146, 147]   |
|                                                |               |                | <i>Smurf1</i> -KD BMSCs | Enhance            | [148]        |
|                                                |               |                | DBP                     | No Change          | [149]        |
|                                                |               |                | EGF                     | Enhance            | [150]        |
|                                                |               |                | EPO                     | Enhance            | [151]        |
|                                                |               |                | bFGF                    | Enhance            | [152, 153]   |
|                                                |               |                |                         | No Change          | [150, 154]   |
|                                                |               |                | LIPUS                   | Enhance            | [155]        |
|                                                |               |                | OPG                     | Enhance            | [156]        |
|                                                |               |                | PEMF                    | Enhance            | [157]        |
|                                                |               |                | PDGF                    | Enhance            | [150]        |
|                                                |               |                | PRP                     | Enhance            | [158]        |
|                                                |               |                |                         | No Change          | [159]        |
|                                                |               |                | iPTH                    | Enhance            | [160]        |
|                                                |               |                | Phenamil                | Enhance            | [161]        |
|                                                |               |                | SDF1                    | Enhance            | [162, 163]   |
|                                                |               |                |                         | No Change          | [164]        |
|                                                |               |                | TGFβ2                   | No Change          | [165]        |
|                                                |               |                | VEGF                    | Enhance            | [166-168]    |
|                                                |               |                |                         | No Change          | [150, 169]   |
|                                                | Gene Transfer | None           | NA                      | [170-188]          |              |
|                                                |               | ASCs           | ND                      | [189-192]          |              |
|                                                |               | ASCs + miR148b | Enhance                 | [193]              |              |
|                                                |               | BMP7           | ND                      | [194]              |              |
| BMP7 + BLKs                                    |               | Enhance        | [195]                   |                    |              |
| BMSCs                                          |               | ND             | [196-227]               |                    |              |
| BMSCs + PDGF                                   |               | Enhance        | [228]                   |                    |              |
| BMSCs + EPCs                                   |               | Enhance        | [229]                   |                    |              |
| DFs                                            |               | ND/Enhance     | [171, 230]              |                    |              |
| MDCs                                           |               | ND             | [231-233]               |                    |              |
| OPG                                            | Enhance       | [156]          |                         |                    |              |

|                                  |                |                  |                         |                  |                    |
|----------------------------------|----------------|------------------|-------------------------|------------------|--------------------|
|                                  |                |                  | PDLSCs                  | ND               | [234]              |
|                                  |                |                  | VEGF                    | ND               | [235]              |
|                                  | B2A2           | Peptide          | None                    | NA               | [236]              |
|                                  | BMP4           | Recombinant      | None                    | NA               | [237-240]          |
|                                  |                | Gene Transfer    | None                    | NA               | [241-243]          |
|                                  |                |                  | BMSCs                   | ND               | [244-246]          |
|                                  | BMP6           | MDCs             | ND                      | NA               | [245, 247]         |
|                                  |                | Recombinant      | None                    | NA               | [248]              |
|                                  | BMP7           | Gene Transfer    | None                    | NA               | [172]              |
|                                  |                |                  | None                    | NA               | [17, 110, 248-276] |
|                                  |                | Recombinant      | None                    | NA               | [170, 282-284]     |
|                                  |                |                  | BMSCs                   | Enhance          | 154                |
|                                  |                |                  | BBP                     | Enhance          | [277]              |
|                                  |                |                  | iPTH                    | Enhance          | [278]              |
|                                  |                |                  | TGF $\beta$ 2           | No Change        | [279]              |
|                                  |                |                  | ZA                      | Enhance          | [280]              |
|                                  |                | Gene Transfer    | None                    | NA               | [281]              |
|                                  |                |                  | BMP2 + BLKs             | Enhance          | [285]              |
|                                  | BMSCs          |                  | ND                      | [286-290]        |                    |
|                                  | DFs            |                  | ND                      | [291]            |                    |
| BMP9                             | Gene Transfer  | PDGF             | Enhance                 | [292]            |                    |
|                                  |                | Periosteal Cells | ND                      | [292]            |                    |
| GDF5                             | Recombinant    | None             | NA                      | [173, 293]       |                    |
| GDF5-N445T                       | Recombinant    | None             | NA                      | [294-298]        |                    |
| GDF5-V453/V456                   | Recombinant    | None             | NA                      | [299]            |                    |
| Noggin siRNA                     | Gene Transfer  | None             | NA                      | [298]            |                    |
|                                  |                | OBs              | ND                      | [300]            |                    |
| P1                               | Recombinant    | None             | NA                      | [301, 302]       |                    |
| PEP7                             | Peptide        | None             | NA                      | [303]            |                    |
| Smurf1 siRNA                     | Gene Transfer  | ASCs + BMP2      | ND                      | [21]             |                    |
| Bone / Tooth Regeneration        | BMP2           | Recombinant      | BMSCs + BMP2            | Enhance          | [148]              |
|                                  |                |                  | None                    | NA               | [304, 305]         |
| Craniosynostosis                 | Noggin         | Gene Transfer    | Fibrin                  | Enhance          | [306]              |
|                                  |                |                  | None                    | NA               | [307]              |
|                                  |                |                  | MDCs                    | ND               | [308]              |
| Heterotopic/Ectopic Ossification | BMP2           | Recombinant      | None                    | NA               | [309]              |
|                                  |                |                  | EP4A                    | Enhance          | [310]              |
|                                  |                |                  | FGF2                    | Enhance/Decrease | [311, 312]         |
|                                  |                |                  | Heparin                 | Enhance          | [313, 314]         |
|                                  |                |                  | PDE Inhibitor           | Enhance          | [315]              |
|                                  |                |                  | SB-431542               | No Change        | [316]              |
|                                  |                |                  | Spp24                   | Decrease         | [317-319]          |
|                                  |                |                  | TNP-470                 | Decrease         | [320]              |
|                                  |                | Gene Transfer    | VEGF                    | Enhance          | [321, 322]         |
|                                  |                |                  | Y-27632                 | Enhance          | [323]              |
|                                  |                |                  | BMP7 + BLKs             | Enhance          | [324]              |
|                                  |                |                  | FK506                   | Enhance          | [325]              |
|                                  |                |                  | Noggin + MDCs           | Decrease         | [326]              |
|                                  |                |                  | Runx2 + ASCs            | Enhance          | [327]              |
|                                  |                | Small Molecule   | VEGF + Periosteal Cells | Enhance          | [328]              |
|                                  |                |                  | VEGF + BMSCs            | Enhance          | [329]              |
|                                  | None           |                  | NA                      | [330]            |                    |
| Corticosteroid                   | Small Molecule | None             | NA                      | [331]            |                    |
| LDN-193189                       | Small Molecule | None             | NA                      | [331, 332]       |                    |
| LDN-212854                       | Small Molecule | None             | NA                      | [333]            |                    |
| Noggin                           | Gene Transfer  | None             | NA                      | [334]            |                    |
| Noggin $\Delta$ B2               | Gene Transfer  | None             | NA                      | [334]            |                    |

|                                                   |                       |                |                  |            |                |
|---------------------------------------------------|-----------------------|----------------|------------------|------------|----------------|
|                                                   | Perhexiline           | Small Molecule | None             | NA         | [335]          |
|                                                   | RAR- $\gamma$ agonist | Small Molecule | None             | NA         | [336]          |
| IVD Degeneration                                  | BMP2                  | Gene Transfer  | None             | NA         | [337, 338]     |
|                                                   | BMP7                  | Recombinant    | None             | NA         | [339]          |
|                                                   |                       | Gene Transfer  | Chondrocytes     | ND         | [340]          |
|                                                   |                       |                | NPCs             | ND         | [341]          |
|                                                   | GDF5                  | Recombinant    | None             | NA         | [342]          |
| Joint Fusion                                      | BMP2                  | Recombinant    | None             | NA         | [109, 343-401] |
|                                                   |                       |                | BMP7             | Enhance    | [402]          |
|                                                   |                       |                | COMP             | Enhance    | [403]          |
|                                                   |                       |                | iPTH             | Enhance    | [404]          |
|                                                   |                       |                | BMSCs            | Enhance    | [405-407]      |
|                                                   |                       |                | EP4A             | Enhance    | [408]          |
|                                                   |                       |                | bFGF + BMSCs     | Enhance    | [409]          |
|                                                   | Gene Transfer         | None           | NA               | [410, 411] |                |
|                                                   |                       | ASCs           | ND               | [412]      |                |
|                                                   |                       | BMSCs          | ND               | [412-418]  |                |
|                                                   |                       | NRKs           | ND               | [419]      |                |
|                                                   | B2A                   | Peptide        | None             | NA         | [420-422]      |
|                                                   | BMP4                  | Recombinant    | None             | NA         | [423, 424]     |
|                                                   |                       | Gene Transfer  | None             | NA         | [425]          |
|                                                   | BMP6                  | Recombinant    | None             | NA         | [426]          |
|                                                   |                       | Gene Transfer  | None             | NA         | [427]          |
| BMP7                                              | Recombinant           | None           | NA               | [428-440]  |                |
|                                                   |                       | BBP            | Enhance          | [441]      |                |
|                                                   |                       | BMP2           | Enhance          | [402]      |                |
|                                                   | Gene Transfer         | BMSCs          | ND               | [442]      |                |
| BMP9                                              | Gene Transfer         | None           | NA               | [443]      |                |
|                                                   |                       | BMSCs          | ND               | [444]      |                |
| Osteopenia / Osteoporosis                         | ALK3-ECD              | Recombinant    | None             | NA         | [445]          |
|                                                   | BMP2                  | Recombinant    | None             | NA         | [446-448]      |
|                                                   |                       | Gene Transfer  | BMSCs            | ND         | [449, 450]     |
|                                                   | BMP4                  | Gene Transfer  | None             | NA         | [451]          |
|                                                   |                       |                | BMSCs            | ND         | [452]          |
| BMP6                                              | Recombinant           | None           | NA               | [453]      |                |
| BMP7                                              | Recombinant           | None           | NA               | [448]      |                |
| Peri-implantitis                                  | BMP2                  | Gene Transfer  | PDLSCs           | ND         | [234]          |
| Peri-trabecular fibrosis                          | BMP7                  | Recombinant    | None             | NA         | [454]          |
| Rubenstein-Tayibi defects                         | BMP2 + BMP7           | Recombinant    | None             | NA         | [455]          |
| Tendon / Ligament Repair, Integration, Enthesitis | BMP2                  | Recombinant    | None             | NA         | [456-458]      |
|                                                   |                       |                | Periosteal Cells | ND         | [459, 460]     |
|                                                   |                       | Gene Transfer  | None             | NA         | [461]          |
|                                                   |                       |                | SMAD8 + BMSCs    | ND         | [462]          |
|                                                   |                       |                | NRKs             | ND         | [463]          |
|                                                   |                       |                |                  | ND         | [464]          |
|                                                   | BMP4                  | Gene Transfer  | None             | NA         | [464]          |
|                                                   | GDF5                  | Recombinant    | None             | NA         | [465, 466]     |
|                                                   |                       | Gene Transfer  | None             | NA         | [467]          |
|                                                   | GDF6                  | Recombinant    | None             | NA         | [465]          |
|                                                   |                       | Gene Transfer  | None             | NA         | [468]          |
| GDF7                                              | Recombinant           | None           | NA               | [469, 470] |                |
|                                                   | Gene Transfer         | MDSCs          | ND               | [471]      |                |
| Noggin                                            | Gene Transfer         | None           | NA               | [472]      |                |

ASCs, adipose-derived stromal cells; BBP, BMP-binding protein; bFGF, basic fibroblast growth factor; BLKs, embryonic mouse fibroblasts; BM, bone mass; BMD, bone mineral density; BMSCs, bone marrow-derived stromal cells; ca: constitutively active; DBP, vitamin D binding protein; DFs, dermal fibroblasts; ECD, extracellular domain; EGF, epidermal growth factor; EP4A, EP4 receptor agonist; EPCs, endothelial progenitor cells; EPO, erythropoietin; iPTH, intermittent

parathyroid hormone therapy; LIPUS, low-intensity pulsed ultrasound; MDCs, muscle-derived stromal cells; NA, not applicable; ND, no data (direct comparison not reported); NPCs, nucleus pulposus cells; NRKs, normal rat kidney cells; OBs, osteoblasts; OPG, osteoprotegerin; PDGF, platelet-derived growth factor; PDLSCs; periodontal ligament-derived stromal cells; PEMF, pulsed electromagnetic field; PRP, platelet rich plasma; SDF1, stromal cell-derived factor 1; siRNA, small interfering RNA; VEGF, vascular endothelial growth factor; ZA, zoledronic acid.

**Table S2.** Examples of BMP pathway modulation for fibrosis-related applications

| Application                 | Agent          | Technique      | Modifier |                    | Reference  |
|-----------------------------|----------------|----------------|----------|--------------------|------------|
|                             |                |                | Agent    | Effect of Modifier |            |
| Bone Marrow Fibrosis        | BMP7           | Recombinant    | None     | NA                 | [454]      |
| Corneal Fibrosis            | BMP7           | Gene Transfer  | None     | NA                 | [473, 474] |
| Hepatic Fibrosis            | BMP7           | Recombinant    | None     | NA                 | [475, 476] |
|                             |                | Gene Transfer  | None     | NA                 | [477, 478] |
| Lens Fibrosis               | BMP7           | Gene Transfer  | None     | NA                 | [479]      |
|                             | ID1            | Gene Transfer  | None     | NA                 | [479]      |
|                             | ID3            | Gene Transfer  | None     | NA                 | [479]      |
| Prosthesis-related Fibrosis | BMP7           | Recombinant    | None     | NA                 | [276]      |
| Pulmonary Fibrosis          | BMP7           | Recombinant    | None     | NA                 | [480, 481] |
| Renal Fibrosis              | BMP2           | Recombinant    | None     | NA                 | [482]      |
|                             | BMP7           | Recombinant    | None     | NA                 | [483-489]  |
|                             |                | Gene Transfer  | BMSCs    | ND                 | [490]      |
|                             | FK506          | Small Molecule | None     | NA                 | [491]      |
|                             | Gremlin siRNA  | Gene Transfer  | None     | NA                 | [492]      |
|                             | SMAD7          | Gene Transfer  | None     | NA                 | [493]      |
|                             | THR-123        | Peptide        | None     | NA                 | [494]      |
| Trichostatin-A              | Small Molecule | None           | NA       | [495]              |            |

BMSCs, bone marrow-derived stromal cells; NA, not applicable; ND, no data (direct comparison not reported)

**Table S3.** Examples of BMP pathway modulation for (cardio)vascular applications.

| Application                                                        | Agent             | Technique      | Modifier |                    | Reference            |
|--------------------------------------------------------------------|-------------------|----------------|----------|--------------------|----------------------|
|                                                                    |                   |                | Agent    | Effect of Modifier |                      |
| Angiogenesis                                                       | ALK1-Fc           | Recombinant    | None     | NA                 | [496-500]            |
|                                                                    | Anti-BMP9 Ab      | Recombinant    | None     | NA                 | [500]                |
|                                                                    | Anti-BMP10 Ab     | Recombinant    | None     | NA                 | [500]                |
| Hypertensive and/or Prediabetic Cardiac Remodeling                 | BMP2              | Recombinant    | None     | NA                 | [501]                |
|                                                                    | BMP7              | Recombinant    | None     | NA                 | [502, 503]           |
|                                                                    | Smad7             | Gene Transfer  | None     | NA                 | [504]                |
| Myocardial Infarction                                              | BMP2              | Recombinant    | None     | NA                 | [505]                |
|                                                                    | BMP10             | Recombinant    | None     | NA                 | [506]                |
|                                                                    | Dorsomorphin      | Small Molecule | None     | NA                 | [507]                |
|                                                                    | FSLT1             | Recombinant    | None     | NA                 | [508]                |
|                                                                    | Noggin            | Recombinant    | None     | NA                 | [507]                |
|                                                                    | sFRP2             | Gene Transfer  | BMSCs    | ND                 | [509]                |
| Pulmonary Arterial Hypertension                                    | BMP2              | Gene Transfer  | None     | NA                 | [510-513]            |
|                                                                    | BMP9              | Recombinant    | None     | NA                 | [514]                |
|                                                                    | Chloroquine       | Small Molecule | None     | NA                 | [515]                |
|                                                                    | FK506             | Small Molecule | None     | NA                 | [516]                |
|                                                                    | Anti-Gremlin Ab   | Recombinant    | None     | NA                 | [517]                |
|                                                                    | miR-20a antagomiR | Gene Transfer  | None     | NA                 | [518]                |
|                                                                    | Sildenafil        | Small Molecule | None     | NA                 | [519]                |
| Systemic Hypertension                                              | Alk3 siRNA        | Gene Transfer  | None     | NA                 | [521]                |
|                                                                    | Bmp4 siRNA        | Gene Transfer  | None     | NA                 | [521]                |
|                                                                    | Noggin            | Recombinant    | None     | NA                 | [521]                |
|                                                                    | Smad7             | Gene Transfer  | None     | NA                 | [493]                |
| Vascular Inflammation, Atherosclerosis, and Vascular Calcification | Noggin            | Recombinant    | None     | NA                 | [522]                |
|                                                                    | ALK3-ECD          | Recombinant    | None     | NA                 | [523, 524]           |
|                                                                    | BMP7              | Recombinant    | None     | NA                 | [525]                |
|                                                                    | LDN-193189        | Small Molecule | None     | NA                 | [523, 524, 526, 527] |
|                                                                    | sFRP2             | Gene Transfer  | BMSCs    | ND                 | [509]                |

Ab, antibody; BMSCs, bone marrow-derived stromal cells; ECD, extracellular domain; NA, not applicable; ND, no data (direct comparison not reported)

**Table S4.** Examples of BMP pathway modulation for reproduction-related applications.

| Application    | Agent         | Technique   | Modifier |                    | Reference |
|----------------|---------------|-------------|----------|--------------------|-----------|
|                |               |             | Agent    | Effect of Modifier |           |
| Oocyte Quality | BMP6          | Recombinant | None     | NA                 | [528]     |
| Ovulation Rate | BMP6          | Recombinant | None     | NA                 | [528]     |
|                | BMP7          | Recombinant | None     | NA                 | [529]     |
|                | Anti-BMP15 Ab | Recombinant | None     | NA                 | [530-532] |
|                | BMPR2-ECD     | Recombinant | None     | NA                 | [533]     |

Ab, antibody; ECD, extracellular domain; NA, not applicable.

**Table S5.** Examples of BMP pathway modulation for cancer-related applications.

| Application                        | Agent         | Technique      | Modifier   |                    | Reference      |
|------------------------------------|---------------|----------------|------------|--------------------|----------------|
|                                    |               |                | Agent      | Effect of Modifier |                |
| Breast Cancer                      | AB215         | Recombinant    | None       | NA                 | [534]          |
|                                    | BMP2          | Recombinant    | None       | NA                 | [535]          |
| Breast Cancer Metastasis to Bone   | BMP2          | Recombinant    | None       | NA                 | [536]          |
|                                    | BMP2/7        | Recombinant    | None       | NA                 | [537]          |
| Breast Cancer Metastasis to Lung   | DMH1          | Small Molecule | None       | NA                 | [538]          |
| Glioblastoma                       | BMP4          | Gene Transfer  | ASCs       | ND                 | [539]          |
| Lung Cancer                        | BMP2 siRNA    | Gene Transfer  | A549 Cells | ND                 | [540]          |
| Prostate Cancer Metastasis to Bone | Anti-BMP6 Ab  | Recombinant    | None       | Na                 | [541]          |
|                                    | BMP7          | Recombinant    | None       | NA                 | [542]          |
|                                    | LDN-193189    | Small Molecule | None       | NA                 | [543]          |
|                                    | Noggin        | Gene Transfer  | C42b Cells | ND                 | [544]          |
|                                    |               |                | PC-3 Cells | ND                 | [545, 546]     |
| Noggin siRNA                       | Gene Transfer | PC-3 Cells     | ND         | [547]              |                |
| Tumor Angiogenesis                 | ALK1-ECD      | Recombinant    | None       | NA                 | [496-498, 548] |

Ab, antibody; ASCs, adipose-derived stromal cells; ECD, extracellular domain; NA, not applicable; ND, no data (direct comparison not reported).



**Table S6.** Examples of BMP pathway modulation for nervous system-related applications

| Application                 | Agent          | Technique     | Modifier |                    | Reference  |
|-----------------------------|----------------|---------------|----------|--------------------|------------|
|                             |                |               | Agent    | Effect of Modifier |            |
| Intraventricular Hemorrhage | Noggin         | Recombinant   | None     | NA                 | [549]      |
| CNS Ischemia                | BMP7           | Recombinant   | None     | NA                 | [550-553]  |
|                             |                | Gene Transfer | None     | NA                 | [554]      |
|                             | Noggin         | Recombinant   | None     | NA                 | [555]      |
|                             |                | Gene Transfer | BMSCs    | ND                 | [556, 557] |
| Remyelination               | Noggin         | Recombinant   | None     | NA                 | [558, 559] |
| Spinal Cord Injury          | Anti-Noggin Ab | Recombinant   | None     | NA                 | [560, 561] |
|                             | Noggin         | Recombinant   | None     | NA                 | [562, 563] |
|                             |                | Gene Transfer | NPCs     | ND                 | [564]      |

Ab, antibody; BMSCs, bone marrow-derived stromal cells; NA, not applicable; ND, no data (direct comparison not reported); NPCs, neural precursor cells

**Table S7.** Examples of BMP pathway modulation for miscellaneous applications.

| Application                | Agent        | Technique      | Modifier |                    | Reference            |
|----------------------------|--------------|----------------|----------|--------------------|----------------------|
|                            |              |                | Agent    | Effect of Modifier |                      |
| Airway inflammation        | BMP4         | Recombinant    | None     | NA                 | [565]                |
| Inflammatory Bowel Disease | Anti-BMP6 Ab | Recombinant    | None     | NA                 | [566]                |
|                            | BMP7         | Recombinant    | None     | NA                 | [567, 568]           |
|                            | HJV-ECD      | Recombinant    | None     | NA                 | [566]                |
|                            | LDN-193189   | Small Molecule | None     | NA                 | [566, 569]           |
| Iron Deficiency Anemia     | ALK3-ECD     | Recombinant    | None     | NA                 | [569]                |
|                            | Anti-BMP6 Ab | Recombinant    | None     | NA                 | [566, 570, 571]      |
|                            | Dorsomorphin | Small Molecule | None     | NA                 | [572]                |
|                            | Heparin      | Small Molecule | None     | NA                 | [573]                |
|                            | HJV-ECD      | Recombinant    | None     | NA                 | [566, 570, 574, 575] |
|                            | LDN-193189   | Small Molecule | None     | NA                 | [566, 569, 574]      |
| Liver Regeneration         | DMH2         | Small Molecule | None     | NA                 | [576]                |
|                            | LDN-193189   |                |          |                    |                      |
|                            | VU5350       |                |          |                    |                      |
| Lung Injury (Acute)        | LDN-193189   | Small Molecule | None     | NA                 | [577]                |
| Muscular Dystrophy         | Noggin       | Gene Transfer  | None     | NA                 | [578]                |
| Obesity (Diet-induced)     | BMP7         | Recombinant    | None     | NA                 | [579]                |
| Pancreatitis (Acute)       | Noggin       | Recombinant    | None     | NA                 | [580]                |
| Retinal Injury             | BMP4         | Recombinant    | None     | NA                 | [581]                |
| Rhytid                     | ALK3-ECD     | Recombinant    | None     | NA                 | [582]                |
| Strabismus                 | BMP4         | Recombinant    | None     | NA                 | [583]                |

Ab, antibody; ECD, extracellular domain; NA, not applicable.

**Table S8.** Agents shown to increase expression of BMP pathway components, enhance BMP signaling, and/or act synergistically with BMP signaling in a therapeutic context.

| Modifier                 | Effect                                                                             | Reference                 |
|--------------------------|------------------------------------------------------------------------------------|---------------------------|
| Acerogenin A             | Increases BMP2, BMP4, and BMP7 expression                                          | [584]                     |
| 2-Acetyldibenzothiophene | Increases BMP2 expression                                                          | [585]                     |
| AST-II                   | Increases BMP2 expression                                                          | [586]                     |
| BBP                      | Enhances BMP signaling                                                             | [278, 587, 588]           |
| Chloroquine              | Stabilizes BMPR2; enhances BMP signaling                                           | [515, 589]                |
| Cilomilast               | Enhances BMP signaling                                                             | [590]                     |
| Compound 1               | Increases BMP2 expression                                                          | [591]                     |
| Compound 5               | Increases BMP2 expression                                                          | [592]                     |
| Compound 8a              | Increases BMP2 expression                                                          | [591]                     |
| Compound 11              | Increases BMP2 expression                                                          | [593]                     |
| Coumarin                 | Increases BMP2 expression                                                          | [594]                     |
| Diadzein                 | Increases BMP2 expression                                                          | [585]                     |
| DSP                      | Synergy                                                                            | [595]                     |
| EGF                      | Synergy                                                                            | [150]                     |
| Epinephrine              | Enhances BMP signaling                                                             | [596]                     |
| Estradiol                | Enhances BMP signaling                                                             | [597]                     |
| ESW                      | Increases BMP2 expression                                                          | [598]                     |
| Fasudil                  | Increases BMP2 expression and enhances BMP signaling                               | [599, 600]                |
| bFGF                     | Synergy                                                                            | [152, 315, 409]           |
| Formononetin             | Increases BMP2 expression                                                          | [585]                     |
| FSAP                     | Increases BMP signaling by activating BMP2                                         | [601]                     |
| Genistein                | Increases expression of several BMPs                                               | [602]                     |
| Harmine                  | Increases BMP2, BMP4, BMP6, and BMP7 expression                                    | [603]                     |
| HDAC Inhibitor           | Enhances BMP signaling                                                             | [604]                     |
| Heparin sulfate          | Enhances BMP signaling                                                             | [316, 605]                |
| HGF                      | Increases BMP receptor expression                                                  | [606]                     |
| HSE                      | Increases BMP7 expression                                                          | [607]                     |
| HSP70                    | Enhances BMP signaling by binding MGP                                              | [608]                     |
| Icariin                  | Increases BMP2 expression                                                          | [609]                     |
| IGF-1                    | Synergy                                                                            | [610]                     |
| IGF-2                    | Enhances BMP signaling                                                             | [611]                     |
| Iron                     | Increases BMP6 expression                                                          | [612]                     |
| Lactoferrin              | Increases BMP signaling by downregulating Noggin and/or increasing BMP7 expression | [613, 614]                |
| Licochalcone A           | Enhances BMP signaling                                                             | [615]                     |
| LIPUS                    | Increases BMP2, BMP4, BMP6 and BMP7 expression; enhances activity                  | [155, 616-619]            |
| LLLI                     | Increases BMP2 expression and enhances activity                                    | [620]                     |
| Lovastatin               | Increases BMP2 expression                                                          | [621]                     |
| Mechanical Stress        | Increases BMP2, BMP6 and BMP7 expression and enhances signaling                    | [622-624]                 |
| Melatonin                | Increases BMP2 and BMP4 expression                                                 | [625]                     |
| miR-148b                 | Synergy                                                                            | [193]                     |
| Myricetin                | Increases BMP2 expression                                                          | [626]                     |
| NMP                      | Enhances BMP signaling                                                             | [627]                     |
| NOV                      | Increases BMP4 expression                                                          | [628]                     |
| ONO-4819                 | Enhances BMP activity and BMP2 expression                                          | [313, 314, 408, 629, 630] |
| PTH                      | Synergy; enhances BMP signaling and increases BMP2 expression                      | [160, 631-633]            |
| PDGF-BB                  | Synergy                                                                            | [228, 291]                |
| Phenamyl                 | Enhances BMP signaling by promoting SMURF1 degradation                             | [634]                     |
| Phosphoserine            | Increases BMP2 expression                                                          | [635]                     |
| PEMF                     | Synergy; increases BMP2 and BMP7 expression                                        | [636-638]                 |
| Pentoxifylline           | Enhances BMP activity                                                              | [318]                     |
| Resveratrol              | Increases BMP2 and BMP7 expression and BMP signaling                               | [639, 640]                |
| 9-cis Retinoic acid      | Increases BMP7 expression                                                          | [641, 642]                |

|                         |                                                      |                      |
|-------------------------|------------------------------------------------------|----------------------|
| all-trans Retinoic acid | Synergy                                              | [643]                |
| RGD peptide             | Synergy                                              | [644]                |
| Rolipram                | Enhances BMP signaling                               | [317, 319, 590]      |
| Runx2                   | Synergy                                              | [328]                |
| Salidroside             | Increases BMP2, BMP6, and BMP7 expression            | [645]                |
| Serotonin               | Possibly activates BMP signaling                     | [519]                |
| Sildenafil              | Enhances BMP signaling                               | [520, 646-648]       |
| Silibinin               | Increases BMP2 expression                            | [649]                |
| Simvastatin             | Increases BMP2 expression                            | [621, 650-654]       |
| SMURF1 Inhibitors       | Enhances BMP signaling                               | [655-657]            |
| Sox9                    | Synergy                                              | [3]                  |
| Syringetin              | Increases BMP2 expression                            | [658]                |
| TGF $\beta$             | Synergy                                              | [659, 660]           |
| Titanium Particles      | Synergy                                              | [661]                |
| U0126                   | Increases BMP signaling and possibly BMP2 expression | [662]                |
| VEGF                    | Synergy                                              | [166, 167, 329, 330] |
| Y-27632                 | Enhances BMP signaling and BMP4 expression           | [324]                |
| Zoledronic acid         | Synergy                                              | [281]                |

AST-II, astragaloside II; BBP, BMP-binding protein; DSP, dentin sialoprotein; EGF, epidermal growth factor; ESW, extracorporeal shock wave; HDAC, histone deacetylase; HGF, hepatocyte growth factor; HSE, Hwanggeumchal sorghum extract; HSP70, heat shock protein 70; IGF, insulin-like growth factor; LIPUS, low-intensity pulsed ultrasound; LLLI, low-level laser irradiation; MGP, matrix-GLA protein; NMP, N-methyl pyrrolidone; PEMF, pulsed electromagnetic field; PTH, parathyroid hormone; VEGF, vascular endothelial growth factor.

**Table S9.** Agents shown to decrease expression of BMP pathway components, reduce BMP signaling, and/or act antagonistically with BMP signaling in a therapeutic context.

| <b>Modifier</b>       | <b>Effect</b>            | <b>Reference</b> |
|-----------------------|--------------------------|------------------|
| COX-2 inhibitor       | Reduces BMP6 expression  | [663]            |
| FGF2                  | Reduces BMP signaling    | [664]            |
| IGF-1                 | Reduces BMP signaling    | [665]            |
| IL-6                  | Reduces BMPR2 expression | [666]            |
| LPS                   | Reduces BMP signaling    | [667]            |
| Perhexiline           | Reduces BMP signaling    | [335]            |
| NF- $\kappa$ B        | Reduces BMP signaling    | [667]            |
| Progesterone          | Reduces BMP7 expression  | [668]            |
| PTHrP                 | Reduces BMP6 expression  | [669]            |
| Rapamycin             | Reduces BMP signaling    | [670]            |
| Retinoic acid         | Reduces BMP signaling    | [671]            |
| RAR- $\gamma$ agonist | Reduces BMP signaling    | [336]            |
| TNP-470               | Reduces BMP activity     | [323]            |

COX, cyclooxygenase; FGF, fibroblast growth factor; IL, interleukin; LPS, lipopolysaccharide; NF- $\kappa$ B, nuclear factor kappa-light-chain-enhance of activated B cells; PTHrP, parathyroid hormone-related peptide; RAR, retinoic acid receptor.

## Supplemental References:

1. Gelse, K., et al., *Articular cartilage repair by gene therapy using growth factor-producing mesenchymal cells*. Arthritis Rheum, 2003. **48**(2): p. 430-41.
2. Wubbenhorst, D., et al., *Tetracycline-regulated bone morphogenetic protein 2 gene expression in lentivirally transduced primary rabbit chondrocytes for treatment of cartilage defects*. Arthritis Rheum, 2010. **62**(7): p. 2037-46.
3. Cha, B.H., et al., *Cartilage tissue formation from dedifferentiated chondrocytes by codelivery of BMP-2 and SOX-9 genes encoding bicistronic vector*. Cell Transplant, 2013. **22**(9): p. 1519-28.
4. Zhang, X., et al., *The synergistic effects of microfracture, perforated decalcified cortical bone matrix and adenovirus-bone morphogenetic protein-4 in cartilage defect repair*. Biomaterials, 2008. **29**(35): p. 4616-29.
5. Shi, J., et al., *Nanoparticle delivery of the bone morphogenetic protein 4 gene to adipose-derived stem cells promotes articular cartilage repair in vitro and in vivo*. Arthroscopy, 2013. **29**(12): p. 2001-2011 e2.
6. Matsumoto, T., et al., *Cartilage repair in a rat model of osteoarthritis through intraarticular transplantation of muscle-derived stem cells expressing bone morphogenetic protein 4 and soluble Flt-1*. Arthritis Rheum, 2009. **60**(5): p. 1390-405.
7. Mifune, Y., et al., *The effect of platelet-rich plasma on the regenerative therapy of muscle derived stem cells for articular cartilage repair*. Osteoarthritis Cartilage, 2013. **21**(1): p. 175-85.
8. Sukarto, A., et al., *Co-delivery of adipose-derived stem cells and growth factor-loaded microspheres in RGD-grafted N-methacrylate glycol chitosan gels for focal chondral repair*. Biomacromolecules, 2012. **13**(8): p. 2490-502.
9. Hunter, D.J., et al., *Phase 1 safety and tolerability study of BMP-7 in symptomatic knee osteoarthritis*. BMC Musculoskelet Disord, 2010. **11**: p. 232.
10. Forriol, F., et al., *Meniscal repair possibilities using bone morphogenetic protein-7*. Injury, 2014. **45 Suppl 4**: p. S15-21.
11. Mason, J.M., et al., *Cartilage and bone regeneration using gene-enhanced tissue engineering*. Clin Orthop Relat Res, 2000(379 Suppl): p. S171-8.
12. Yoon, B.H., et al., *An Activin A/BMP2 Chimera Displays Bone Healing Properties Superior to Those of BMP2*. J Bone Miner Res, 2014.
13. Ulrich-Vinther, M., *Gene therapy methods in bone and joint disorders. Evaluation of the adeno-associated virus vector in experimental models of articular cartilage disorders, periprosthetic osteolysis and bone healing*. Acta orthopaedica. Supplementum, 2007. **78**(325): p. 1-64.
14. Itaka, K., et al., *Bone regeneration by regulated in vivo gene transfer using biocompatible polyplex nanomicelles*. Molecular therapy : the journal of the American Society of Gene Therapy, 2007. **15**(9): p. 1655-62.
15. Kleinschmidt, K., et al., *Enhanced reconstruction of long bone architecture by a growth factor mutant combining positive features of GDF-5 and BMP-2*. Biomaterials, 2013. **34**(24): p. 5926-36.
16. Wink, J.D., et al., *Sustained delivery of rhBMP-2 via PLGA microspheres: cranial bone regeneration without heterotopic ossification or craniosynostosis*. Plastic and reconstructive surgery, 2014.
17. Huri, P.Y., et al., *A biomimetic growth factor delivery strategy for enhanced regeneration of iliac crest defects*. Biomedical materials, 2013. **8**(4): p. 045009.
18. Herford, A.S., et al., *Immediate distraction osteogenesis: the sandwich technique in combination with rhBMP-2 for anterior maxillary and mandibular defects*. The Journal of craniofacial surgery, 2013. **24**(4): p. 1383-7.
19. Sonnet, C., et al., *Rapid healing of femoral defects in rats with low dose sustained BMP2 expression from PEGDA hydrogel microspheres*. Journal of orthopaedic research : official publication of the Orthopaedic Research Society, 2013. **31**(10): p. 1597-604.
20. Rodriguez-Evora, M., et al., *Osteogenic effect of local, long versus short term BMP-2 delivery from a novel SPU-PLGA-betaTCP concentric system in a critical size defect in rats*. European journal of pharmaceutical sciences : official journal of the European Federation for Pharmaceutical Sciences, 2013. **49**(5): p. 873-84.
21. Kang, E.J., et al., *Evaluation of the osteogenic activity of the BMP-2 mimetic peptide, PEP7, in vitro and in vivo*. The International journal of oral & maxillofacial implants, 2013. **28**(3): p. 749-56.

22. Zhang, J., et al., *RhBMP-2-loaded calcium silicate/calcium phosphate cement scaffold with hierarchically porous structure for enhanced bone tissue regeneration*. *Biomaterials*, 2013. **34**(37): p. 9381-92.
23. Fu, Y.C., et al., *Preparation of porous bioceramics using reverse thermo-responsive hydrogels in combination with rhBMP-2 carriers: in vitro and in vivo evaluation*. *Journal of the mechanical behavior of biomedical materials*, 2013. **27**: p. 64-76.
24. Simank, H.G., et al., *Bone morphogenetic protein-2 and growth and differentiation factor-5 enhance the healing of necrotic bone in a sheep model*. *Growth Factors*, 2001. **19**(4): p. 247-57.
25. Gruber, R.M., et al., *Mandibular reconstruction using a calcium phosphate/polyethylene glycol hydrogel carrier with BMP-2*. *Journal of clinical periodontology*, 2014.
26. Shekaran, A., et al., *Bone regeneration using an alpha 2 beta 1 integrin-specific hydrogel as a BMP-2 delivery vehicle*. *Biomaterials*, 2014. **35**(21): p. 5453-61.
27. Ventura, M., et al., *Monitoring the biological effect of BMP-2 release on bone healing by PET/CT*. *Journal of controlled release : official journal of the Controlled Release Society*, 2014. **183**: p. 138-44.
28. Qiao, C., et al., *Using poly(lactic-co-glycolic acid) microspheres to encapsulate plasmid of bone morphogenetic protein 2/polyethylenimine nanoparticles to promote bone formation in vitro and in vivo*. *International journal of nanomedicine*, 2013. **8**: p. 2985-95.
29. Han, C.M., et al., *Creation of nanoporous TiO<sub>2</sub> surface onto polyetheretherketone for effective immobilization and delivery of bone morphogenetic protein*. *Journal of biomedical materials research. Part A*, 2014. **102**(3): p. 793-800.
30. Lee, J.K., et al., *Bone formation and remodeling of three different dental implant surfaces with Escherichia coli-derived recombinant human bone morphogenetic protein 2 in a rabbit model*. *The International journal of oral & maxillofacial implants*, 2013. **28**(2): p. 424-30.
31. Schwarz, C., et al., *Mechanical load modulates the stimulatory effect of BMP2 in a rat nonunion model*. *Tissue engineering. Part A*, 2013. **19**(1-2): p. 247-54.
32. Chappuis, V., et al., *Periosteal BMP2 activity drives bone graft healing*. *Bone*, 2012. **51**(4): p. 800-9.
33. Kim, B.J., et al., *A comparative study of the effectiveness of sinus bone grafting with recombinant human bone morphogenetic protein 2-coated tricalcium phosphate and platelet-rich fibrin-mixed tricalcium phosphate in rabbits*. *Oral surgery, oral medicine, oral pathology and oral radiology*, 2012. **113**(5): p. 583-92.
34. Diab, T., et al., *A silk hydrogel-based delivery system of bone morphogenetic protein for the treatment of large bone defects*. *Journal of the mechanical behavior of biomedical materials*, 2012. **11**: p. 123-31.
35. Dumas, J.E., et al., *Injectable reactive biocomposites for bone healing in critical-size rabbit calvarial defects*. *Biomedical materials*, 2012. **7**(2): p. 024112.
36. Angle, S.R., et al., *Healing of rat femoral segmental defect with bone morphogenetic protein-2: a dose response study*. *Journal of musculoskeletal & neuronal interactions*, 2012. **12**(1): p. 28-37.
37. Li, D., et al., *Enhancement of osteogenesis by poly(lactide-co-glycolide) sponges loaded with surface-embedded hydroxyapatite particles and rhBMP-2*. *Journal of biomedical materials research. Part B, Applied biomaterials*, 2012. **100**(4): p. 1103-13.
38. Yoo, J.J., et al., *Synthetic peptide-conjugated titanium alloy for enhanced bone formation in vivo*. *Connective tissue research*, 2012. **53**(5): p. 359-65.
39. Tan, R., et al., *Repair of rat calvarial bone defects by controlled release of rhBMP-2 from an injectable bone regeneration composite*. *Journal of tissue engineering and regenerative medicine*, 2012. **6**(8): p. 614-21.
40. Yang, H.S., et al., *Efficient Bone Regeneration Induced by Bone Morphogenetic Protein-2 Released from Apatite-Coated Collagen Scaffolds*. *Journal of biomaterials science. Polymer edition*, 2011.
41. Zhao, J., et al., *Enhanced healing of rat calvarial defects with sulfated chitosan-coated calcium-deficient hydroxyapatite/bone morphogenetic protein 2 scaffolds*. *Tissue engineering. Part A*, 2012. **18**(1-2): p. 185-97.
42. Lesaichot, V., et al., *The influence of Bone Morphogenetic Protein-2 on the consolidation phase in a distraction osteogenesis model*. *Injury*, 2011. **42**(12): p. 1460-6.
43. Fujita, N., et al., *An analysis of bone regeneration at a segmental bone defect by controlled release of bone morphogenetic protein 2 from a biodegradable sponge composed of gelatin and beta-tricalcium phosphate*. *Journal of tissue engineering and regenerative medicine*, 2012. **6**(4): p. 291-8.
44. Kolambkar, Y.M., et al., *Spatiotemporal delivery of bone morphogenetic protein enhances functional repair of segmental bone defects*. *Bone*, 2011. **49**(3): p. 485-92.

45. Spiro, A.S., et al., *Combined treatment of congenital pseudarthrosis of the tibia, including recombinant human bone morphogenetic protein-2: a case series*. The Journal of bone and joint surgery. British volume, 2011. **93**(5): p. 695-9.
46. Song, D.S., et al., *Enhanced adipogenic differentiation and reduced collagen synthesis induced by human periodontal ligament stem cells might underlie the negative effect of recombinant human bone morphogenetic protein-2 on periodontal regeneration*. Journal of periodontal research, 2011. **46**(2): p. 193-203.
47. Minear, S., et al., *rhBMP represses Wnt signaling and influences skeletal progenitor cell fate specification during bone repair*. Journal of bone and mineral research : the official journal of the American Society for Bone and Mineral Research, 2010. **25**(6): p. 1196-207.
48. Cooper, G.M., et al., *Inkjet-based biopatterning of bone morphogenetic protein-2 to spatially control calvarial bone formation*. Tissue engineering. Part A, 2010. **16**(5): p. 1749-59.
49. Nguyen, P.D., et al., *Scaffold-based rhBMP-2 therapy in a rat alveolar defect model: implications for human gingivoperiosteoplasty*. Plastic and reconstructive surgery, 2009. **124**(6): p. 1829-39.
50. Sailhan, F., et al., *Rh-BMP-2 in distraction osteogenesis: dose effect and premature consolidation*. Injury, 2010. **41**(7): p. 680-6.
51. Smeets, R., et al., *Impact of rhBMP-2 on regeneration of buccal alveolar defects during the osseointegration of transgingival inserted implants*. Oral surgery, oral medicine, oral pathology, oral radiology, and endodontics, 2009. **108**(4): p. e3-e12.
52. Boraiah, S., et al., *Complications of recombinant human BMP-2 for treating complex tibial plateau fractures: a preliminary report*. Clinical orthopaedics and related research, 2009. **467**(12): p. 3257-62.
53. Liu, Y., et al., *Segmental bone regeneration using an rhBMP-2-loaded gelatin/nanohydroxyapatite/fibrin scaffold in a rabbit model*. Biomaterials, 2009. **30**(31): p. 6276-85.
54. Sarban, S., et al., *Can rhBMP-2 containing collagen sponges enhance bone repair in ovariectomized rats?: a preliminary study*. Clinical orthopaedics and related research, 2009. **467**(12): p. 3113-20.
55. Azad, V., et al., *rhBMP-2 enhances the bone healing response in a diabetic rat segmental defect model*. Journal of orthopaedic trauma, 2009. **23**(4): p. 267-76.
56. Schnettler, R., et al., *Enhancement of bone formation in hydroxyapatite implants by rhBMP-2 coating*. Journal of biomedical materials research. Part B, Applied biomaterials, 2009. **90**(1): p. 75-81.
57. Wikesjo, U.M., et al., *Bone formation at recombinant human bone morphogenetic protein-2-coated titanium implants in the posterior mandible (Type II bone) in dogs*. Journal of clinical periodontology, 2008. **35**(11): p. 985-91.
58. Bodde, E.W., et al., *The kinetic and biological activity of different loaded rhBMP-2 calcium phosphate cement implants in rats*. Journal of biomedical materials research. Part A, 2008. **87**(3): p. 780-91.
59. Kim, S.S., S.J. Gwak, and B.S. Kim, *Orthotopic bone formation by implantation of apatite-coated poly(lactide-co-glycolide)/hydroxyapatite composite particulates and bone morphogenetic protein-2*. Journal of biomedical materials research. Part A, 2008. **87**(1): p. 245-53.
60. Ma, B., et al., *The effect of simvastatin on bone formation and ceramic resorption in a peri-implant defect model*. Acta biomaterialia, 2008. **4**(1): p. 149-55.
61. Kang, P., et al., *Repairing defect and preventing collapse of canine femoral head using titanium implant enhanced by autogenous bone graft and rhBMP-2*. Connective tissue research, 2007. **48**(4): p. 171-9.
62. Chen, F.M., et al., *Periodontal regeneration using novel glycidyl methacrylated dextran (Dex-GMA)/gelatin scaffolds containing microspheres loaded with bone morphogenetic proteins*. Journal of controlled release : official journal of the Controlled Release Society, 2007. **121**(1-2): p. 81-90.
63. Zheng, L.W. and L.K. Cheung, *Effect of recombinant human bone morphogenetic protein-2 on mandibular distraction at different rates in a rabbit model*. Tissue engineering, 2006. **12**(11): p. 3181-8.
64. Takahashi, Y., et al., *Skull bone regeneration in nonhuman primates by controlled release of bone morphogenetic protein-2 from a biodegradable hydrogel*. Tissue engineering, 2007. **13**(2): p. 293-300.
65. Faria, M.L., et al., *Recombinant human bone morphogenetic protein-2 in absorbable collagen sponge enhances bone healing of tibial osteotomies in dogs*. Veterinary surgery : VS, 2007. **36**(2): p. 122-31.
66. Liu, H.W., et al., *Targeted delivery system for juxtacrine signaling growth factor based on rhBMP-2-mediated carrier-protein conjugation*. Bone, 2006. **39**(4): p. 825-36.
67. Cheung, L.K. and L.W. Zheng, *Effect of recombinant human bone morphogenetic protein-2 on mandibular distraction at different rates in an experimental model*. The Journal of craniofacial surgery, 2006. **17**(1): p. 100-8; discussion 109-10.



68. Siebert, C.H., et al., *Ingrowth of osteochondral grafts under the influence of growth factors: 6-month results of an animal study*. Archives of orthopaedic and trauma surgery, 2006. **126**(4): p. 247-52.
69. Bergenholtz, G., et al., *Observations on healing following endodontic surgery in nonhuman primates (Macaca fascicularis): effects of rhBMP-2*. Oral surgery, oral medicine, oral pathology, oral radiology, and endodontics, 2006. **101**(1): p. 116-25.
70. Schliephake, H., et al., *Effect of immobilized bone morphogenetic protein 2 coating of titanium implants on peri-implant bone formation*. Clinical oral implants research, 2005. **16**(5): p. 563-9.
71. Wikesjo, U.M., G. Polimeni, and M. Qahash, *Tissue engineering with recombinant human bone morphogenetic protein-2 for alveolar augmentation and oral implant osseointegration: experimental observations and clinical perspectives*. Clinical implant dentistry and related research, 2005. **7**(2): p. 112-9.
72. Rachmiel, A., D. Aizenbud, and M. Peled, *Enhancement of bone formation by bone morphogenetic protein-2 during alveolar distraction: an experimental study in sheep*. Journal of periodontology, 2004. **75**(11): p. 1524-31.
73. Sykaras, N., et al., *Effect of recombinant human bone morphogenetic protein-2 on the osseointegration of dental implants: a biomechanics study*. Clinical oral investigations, 2004. **8**(4): p. 196-205.
74. Kamakura, S., et al., *New scaffold for recombinant human bone morphogenetic protein-2*. Journal of biomedical materials research. Part A, 2004. **71**(2): p. 299-307.
75. Morcuende, J.A., et al., *Effect of chemotherapy on segmental bone healing enhanced by rhBMP-2*. The Iowa orthopaedic journal, 2004. **24**: p. 36-42.
76. Wikesjo, U.M., et al., *rhBMP-2 significantly enhances guided bone regeneration*. Clinical oral implants research, 2004. **15**(2): p. 194-204.
77. Einhorn, T.A., et al., *A single percutaneous injection of recombinant human bone morphogenetic protein-2 accelerates fracture repair*. The Journal of bone and joint surgery. American volume, 2003. **85-A**(8): p. 1425-35.
78. Blumenthal, N.M., et al., *Effect of surgical implantation of recombinant human bone morphogenetic protein-2 in a bioabsorbable collagen sponge or calcium phosphate putty carrier in intrabony periodontal defects in the baboon*. Journal of periodontology, 2002. **73**(12): p. 1494-506.
79. Murakami, N., et al., *Repair of segmental defects in rabbit humeri with titanium fiber mesh cylinders containing recombinant human bone morphogenetic protein-2 (rhBMP-2) and a synthetic polymer*. Journal of biomedical materials research, 2002. **62**(2): p. 169-74.
80. Luppen, C.A., et al., *Recombinant human bone morphogenetic protein-2 enhances osteotomy healing in glucocorticoid-treated rabbits*. Journal of bone and mineral research : the official journal of the American Society for Bone and Mineral Research, 2002. **17**(2): p. 301-10.
81. Sigurdsson, T.J., S. Nguyen, and U.M. Wikesjo, *Alveolar ridge augmentation with rhBMP-2 and bone-to-implant contact in induced bone*. The International journal of periodontics & restorative dentistry, 2001. **21**(5): p. 461-73.
82. Bouxsein, M.L., et al., *Recombinant human bone morphogenetic protein-2 accelerates healing in a rabbit ulnar osteotomy model*. The Journal of bone and joint surgery. American volume, 2001. **83-A**(8): p. 1219-30.
83. Wikesjo, U.M., R.G. Sorensen, and J.M. Wozney, *Augmentation of alveolar bone and dental implant osseointegration: clinical implications of studies with rhBMP-2*. The Journal of bone and joint surgery. American volume, 2001. **83-A Suppl 1**(Pt 2): p. S136-45.
84. Sebald, H.J., et al., *Inhibition of endogenous antagonists with an engineered BMP-2 variant increases BMP-2 efficacy in rat femoral defect healing*. Acta biomaterialia, 2012. **8**(10): p. 3816-20.
85. Luvizuto, E.R., et al., *The effect of BMP-2 on the osteoconductive properties of beta-tricalcium phosphate in rat calvaria defects*. Biomaterials, 2011. **32**(15): p. 3855-61.
86. Yu, Y.Y., et al., *Bone morphogenetic protein 2 stimulates endochondral ossification by regulating periosteal cell fate during bone repair*. Bone, 2010. **47**(1): p. 65-73.
87. Issa, J.P., et al., *Effect of recombinant human bone morphogenetic protein-2 on bone formation in the acute distraction osteogenesis of rat mandibles*. Clinical oral implants research, 2009. **20**(11): p. 1286-92.
88. Lopez-Lacomba, J.L., et al., *Use of rhBMP-2 activated chitosan films to improve osseointegration*. Biomacromolecules, 2006. **7**(3): p. 792-8.

89. Sachse, A., et al., *Osteointegration of hydroxyapatite-titanium implants coated with nonglycosylated recombinant human bone morphogenetic protein-2 (BMP-2) in aged sheep*. *Bone*, 2005. **37**(5): p. 699-710.
90. Jung, R.E., et al., *Effect of rhBMP-2 on guided bone regeneration in humans*. *Clinical oral implants research*, 2003. **14**(5): p. 556-68.
91. Wikesjö, U.M., et al., *Periodontal repair in dogs: space-providing ePTFE devices increase rhBMP-2/ACS-induced bone formation*. *Journal of clinical periodontology*, 2003. **30**(8): p. 715-25.
92. Yoshida, K., et al., *Enhancement by recombinant human bone morphogenetic protein-2 of bone formation by means of porous hydroxyapatite in mandibular bone defects*. *Journal of dental research*, 1999. **78**(9): p. 1505-10.
93. Lee, S.C., et al., *Healing of large segmental defects in rat femurs is aided by RhBMP-2 in PLGA matrix*. *Journal of biomedical materials research*, 1994. **28**(10): p. 1149-56.
94. Hanseler, P., et al., *Delivery of BMP-2 by two clinically available apatite materials: In vitro and in vivo comparison*. *Journal of biomedical materials research. Part A*, 2014.
95. Lee, J.S., et al., *Controlled release of BMP-2 using a heparin-conjugated carrier system reduces in vivo adipose tissue formation*. *Journal of biomedical materials research. Part A*, 2014.
96. Pelaez, M., et al., *Effect of rhBMP-2 Dose on Bone Formation/Maturation in a Rat Critical-size Calvarial Defect Model*. *Journal of clinical periodontology*, 2014.
97. Song, S.H., et al., *Bone Formation in a Rat Tibial Defect Model Using Carboxymethyl Cellulose/BioC/Bone Morphogenic Protein-2 Hybrid Materials*. *BioMed research international*, 2014. **2014**: p. 230152.
98. Rodriguez-Evora, M., et al., *Bone regeneration induced by an in situ gel-forming poloxamine, bone morphogenetic protein-2 system*. *Journal of biomedical nanotechnology*, 2014. **10**(6): p. 959-69.
99. Jensen, O.T., et al., *Experience with bone morphogenetic protein-2 and interpositional grafting of edentulous maxillae: a comparison of Le Fort I downfracture to full-arch (horseshoe) segmental osteotomy done in conjunction with sinus floor grafting*. *The International journal of oral & maxillofacial implants*, 2013. **28**(6): p. e331-48.
100. Casap, N., et al., *Recombinant human bone morphogenetic protein-2 confined by an imperforate titanium shell over high-profile dental implants in rabbit tibiae: a pilot bone augmentation study*. *The International journal of oral & maxillofacial implants*, 2013. **28**(6): p. e349-56.
101. Marx, R.E., et al., *rhBMP-2/ACS grafts versus autogenous cancellous marrow grafts in large vertical defects of the maxilla: an unsponsored randomized open-label clinical trial*. *The International journal of oral & maxillofacial implants*, 2013. **28**(5): p. e243-51.
102. Cottam, J.R., et al., *Closure of 1.5-cm alveolar oral antral fistula with intra-alveolar sinus membrane elevation and bone morphogenetic protein-2/collagen graft followed by dental implant restoration: case report*. *The International journal of oral & maxillofacial implants*, 2013. **28**(5): p. e277-82.
103. Cha, J.K., et al., *Sinus augmentation using BMP-2 in a bovine hydroxyapatite/collagen carrier in dogs*. *Journal of clinical periodontology*, 2014. **41**(1): p. 86-93.
104. Kim, J.S., et al., *Acceleration of Bone Regeneration by BMP-2-Loaded Collagenated Biphasic Calcium Phosphate in Rabbit Sinus*. *Clinical implant dentistry and related research*, 2014.
105. Lai, C.H., et al., *Use of a collagen membrane loaded with recombinant human bone morphogenetic protein-2 with collagen-binding domain for vertical guided bone regeneration*. *Journal of periodontology*, 2013. **84**(7): p. 950-7.
106. Lopes, N.M., et al., *Use of rhBMP-2 to reconstruct a severely atrophic mandible: a modified approach*. *International journal of oral and maxillofacial surgery*, 2012. **41**(12): p. 1566-70.
107. Yamashita, M., et al., *A pilot experimental lateral ridge augmentation study using bone morphogenetic protein 2 in dogs*. *The International journal of periodontics & restorative dentistry*, 2010. **30**(5): p. 457-69.
108. Thoma, D.S., et al., *Ridge augmentation using recombinant bone morphogenetic protein-2 techniques: an experimental study in the canine*. *Journal of periodontology*, 2010. **81**(12): p. 1829-38.
109. O'Shaughnessy, B.A., T.R. Kuklo, and S.L. Ondra, *Surgical treatment of vertebral osteomyelitis with recombinant human bone morphogenetic protein-2*. *Spine (Phila Pa 1976)*, 2008. **33**(5): p. E132-9.
110. Strassmair, M., et al., *The use of a Type-I lyophilisate collagen as an osteoinductive factor in pseudarthroses of the forearm*. *Surg Technol Int*, 2009. **18**: p. 213-8.

111. Lyon, T., et al., *Efficacy and safety of recombinant human bone morphogenetic protein-2/calcium phosphate matrix for closed tibial diaphyseal fracture: a double-blind, randomized, controlled phase-II/III trial.* J Bone Joint Surg Am, 2013. **95**(23): p. 2088-96.
112. Flierl, M.A., et al., *Outcomes and complication rates of different bone grafting modalities in long bone fracture nonunions: a retrospective cohort study in 182 patients.* J Orthop Surg Res, 2013. **8**: p. 33.
113. Skogh, A.C., et al., *Variation in calvarial bone healing capacity: a clinical study on the effects of BMP-2-hydrogel or bone autograft treatments at different cranial locations.* J Craniofac Surg, 2013. **24**(2): p. 339-43.
114. Canan, L.W., Jr., et al., *Human bone morphogenetic protein-2 use for maxillary reconstruction in cleft lip and palate patients.* J Craniofac Surg, 2012. **23**(6): p. 1627-33.
115. Neovius, E., et al., *Alveolar bone healing accompanied by severe swelling in cleft children treated with bone morphogenetic protein-2 delivered by hydrogel.* J Plast Reconstr Aesthet Surg, 2013. **66**(1): p. 37-42.
116. Tsuzuki, N., et al., *In vivo osteoinductivity of gelatin beta-tri-calcium phosphate sponge and bone morphogenetic protein-2 on an equine third metacarpal bone defect.* Res Vet Sci, 2012. **93**(2): p. 1021-5.
117. Aro, H.T., et al., *Recombinant human bone morphogenetic protein-2: a randomized trial in open tibial fractures treated with reamed nail fixation.* J Bone Joint Surg Am, 2011. **93**(9): p. 801-8.
118. Alonso, N., et al., *Evaluation of maxillary alveolar reconstruction using a resorbable collagen sponge with recombinant human bone morphogenetic protein-2 in cleft lip and palate patients.* Tissue Eng Part C Methods, 2010. **16**(5): p. 1183-9.
119. Alt, V., et al., *A health economic analysis of the use of rhBMP-2 in Gustilo-Anderson grade III open tibial fractures for the UK, Germany, and France.* Injury, 2009. **40**(12): p. 1269-75.
120. Jung, R.E., et al., *A randomized-controlled clinical trial evaluating clinical and radiological outcomes after 3 and 5 years of dental implants placed in bone regenerated by means of GBR techniques with or without the addition of BMP-2.* Clin Oral Implants Res, 2009. **20**(7): p. 660-6.
121. Dickinson, B.P., et al., *Reduced morbidity and improved healing with bone morphogenic protein-2 in older patients with alveolar cleft defects.* Plast Reconstr Surg, 2008. **121**(1): p. 209-17.
122. Jones, A.L., et al., *Recombinant human BMP-2 and allograft compared with autogenous bone graft for reconstruction of diaphyseal tibial fractures with cortical defects. A randomized, controlled trial.* J Bone Joint Surg Am, 2006. **88**(7): p. 1431-41.
123. Swiontkowski, M.F., et al., *Recombinant human bone morphogenetic protein-2 in open tibial fractures. A subgroup analysis of data combined from two prospective randomized studies.* J Bone Joint Surg Am, 2006. **88**(6): p. 1258-65.
124. Bianchi, J., et al., *Measuring the efficacy of rhBMP-2 to regenerate bone: a radiographic study using a commercially available software program.* Int J Periodontics Restorative Dent, 2004. **24**(6): p. 579-87.
125. Govender, S., et al., *Recombinant human bone morphogenetic protein-2 for treatment of open tibial fractures: a prospective, controlled, randomized study of four hundred and fifty patients.* J Bone Joint Surg Am, 2002. **84-A**(12): p. 2123-34.
126. Maniscalco, P., et al., *Healing of fresh tibial fractures with OP-1. A preliminary report.* Acta Biomed, 2002. **73**(1-2): p. 27-33.
127. Riedel, G.E. and A. Valentin-Opran, *Clinical evaluation of rhBMP-2/ACS in orthopedic trauma: a progress report.* Orthopedics, 1999. **22**(7): p. 663-5.
128. de Freitas, R.M., et al., *Horizontal ridge augmentation of the atrophic anterior maxilla using rhBMP-2/ACS or autogenous bone grafts: a proof-of-concept randomized clinical trial.* J Clin Periodontol, 2013. **40**(10): p. 968-75.
129. Kao, D.W., et al., *The negative effect of combining rhBMP-2 and Bio-Oss on bone formation for maxillary sinus augmentation.* Int J Periodontics Restorative Dent, 2012. **32**(1): p. 61-7.
130. Triplett, R.G., et al., *Pivotal, randomized, parallel evaluation of recombinant human bone morphogenetic protein-2/absorbable collagen sponge and autogenous bone graft for maxillary sinus floor augmentation.* J Oral Maxillofac Surg, 2009. **67**(9): p. 1947-60.
131. Serra, E.S.F.M., J. Ricardo de Albergaria-Barbosa, and R. Mazzonetto, *Clinical evaluation of association of bovine organic osseous matrix and bovine bone morphogenetic protein versus autogenous bone graft in sinus floor augmentation.* J Oral Maxillofac Surg, 2006. **64**(6): p. 931-5.
132. Boyne, P.J., et al., *De novo bone induction by recombinant human bone morphogenetic protein-2 (rhBMP-2) in maxillary sinus floor augmentation.* J Oral Maxillofac Surg, 2005. **63**(12): p. 1693-707.

133. Fiorellini, J.P., et al., *Randomized study evaluating recombinant human bone morphogenetic protein-2 for extraction socket augmentation*. J Periodontol, 2005. **76**(4): p. 605-13.
134. Cochran, D.L., et al., *Evaluation of recombinant human bone morphogenetic protein-2 in oral applications including the use of endosseous implants: 3-year results of a pilot study in humans*. J Periodontol, 2000. **71**(8): p. 1241-57.
135. Boyne, P.J., et al., *A feasibility study evaluating rhBMP-2/absorbable collagen sponge for maxillary sinus floor augmentation*. Int J Periodontics Restorative Dent, 1997. **17**(1): p. 11-25.
136. Howell, T.H., et al., *A feasibility study evaluating rhBMP-2/absorbable collagen sponge device for local alveolar ridge preservation or augmentation*. Int J Periodontics Restorative Dent, 1997. **17**(2): p. 124-39.
137. Kim, H.C., et al., *Combined effect of bisphosphonate and recombinant human bone morphogenetic protein 2 on bone healing of rat calvarial defects*. Maxillofac Plast Reconstr Surg, 2015. **37**(1): p. 16.
138. Chen, X., et al., *Union of a chronically infected internally stabilized segmental defect in the rat femur after debridement and application of rhBMP-2 and systemic antibiotic*. Journal of orthopaedic trauma, 2007. **21**(10): p. 693-700.
139. Sandor, G.K., et al., *Adipose stem cells used to reconstruct 13 cases with cranio-maxillofacial hard-tissue defects*. Stem Cells Transl Med, 2014. **3**(4): p. 530-40.
140. Smith, D.M., et al., *Regenerative surgery in cranioplasty revisited: the role of adipose-derived stem cells and BMP-2*. Plastic and reconstructive surgery, 2011. **128**(5): p. 1053-60.
141. Kang, S.W., et al., *Combination therapy with BMP-2 and BMSCs enhances bone healing efficacy of PCL scaffold fabricated using the 3D plotting system in a large segmental defect model*. Biotechnology letters, 2012. **34**(7): p. 1375-84.
142. Stephan, S.J., et al., *Injectable tissue-engineered bone repair of a rat calvarial defect*. The Laryngoscope, 2010. **120**(5): p. 895-901.
143. Xia, L., et al., *Maxillary sinus floor elevation using a tissue-engineered bone with rhBMP-2-loaded porous calcium phosphate cement scaffold and bone marrow stromal cells in rabbits*. Cells, tissues, organs, 2011. **194**(6): p. 481-93.
144. Jo, S., et al., *Effects of recombinant human bone morphogenic protein-2 and human bone marrow-derived stromal cells on in vivo bone regeneration of chitosan-poly(ethylene oxide) hydrogel*. J Biomed Mater Res A, 2013. **101**(3): p. 892-901.
145. Marx, R.E. and D.B. Harrell, *Translational research: The CD34+ cell is crucial for large-volume bone regeneration from the milieu of bone marrow progenitor cells in craniomandibular reconstruction*. Int J Oral Maxillofac Implants, 2014. **29**(2): p. e201-9.
146. Terella, A., et al., *Repair of a calvarial defect with biofactor and stem cell-embedded polyethylene glycol scaffold*. Archives of facial plastic surgery, 2010. **12**(3): p. 166-71.
147. Kirker-Head, C., et al., *BMP-silk composite matrices heal critically sized femoral defects*. Bone, 2007. **41**(2): p. 247-55.
148. Rodriguez-Evora, M., et al., *Smurf1 Knocked-Down, Mesenchymal Stem Cells and BMP-2 in an Electrospun System for Bone Regeneration*. Biomacromolecules, 2014. **15**(4): p. 1311-22.
149. Sun, J.S., et al., *Vitamin-D binding protein does not enhance healing in rat bone defects: a pilot study*. Clinical orthopaedics and related research, 2009. **467**(12): p. 3156-64.
150. Lee, J.H., et al., *Synergistic induction of early stage of bone formation by combination of recombinant human bone morphogenetic protein-2 and epidermal growth factor*. Journal of tissue engineering and regenerative medicine, 2014.
151. Patel, J.J., et al., *Dual Delivery of EPO and BMP2 from a Novel Modular Poly-varepsilon-Caprolactone Construct to Increase the Bone Formation in Prefabricated Bone Flaps*. Tissue Eng Part C Methods, 2015. **21**(9): p. 889-97.
152. Su, J., et al., *Dual Delivery of BMP-2 and bFGF from a New Nano-Composite Scaffold, Loaded with Vascular Stents for Large-Size Mandibular Defect Regeneration*. International journal of molecular sciences, 2013. **14**(6): p. 12714-28.
153. Springer, I.N., et al., *BMP-2 and bFGF in an irradiated bone model*. Journal of cranio-maxillo-facial surgery : official publication of the European Association for Cranio-Maxillo-Facial Surgery, 2008. **36**(4): p. 210-7.
154. Charles, L.F., et al., *Effects of low dose FGF-2 and BMP-2 on healing of calvarial defects in old mice*. Exp Gerontol, 2015. **64**: p. 62-9.

155. Angle, S.R., et al., *Combined Use of Low Intensity Pulsed Ultrasound and rhBMP-2 to Enhance Bone Formation in a Rat Model of Critical-Size Defect*. J Orthop Trauma, 2014.
156. Bougioukli, S., et al., *Combination therapy with BMP-2 and a systemic RANKL inhibitor enhances bone healing in a mouse critical-sized femoral defect*. Bone, 2015. **84**: p. 93-103.
157. Yang, H.J., R.Y. Kim, and S.J. Hwang, *Pulsed Electromagnetic Fields Enhance Bone Morphogenetic Protein-2 Dependent-Bone Regeneration*. Tissue Eng Part A, 2015. **21**(19-20): p. 2629-37.
158. Park, E.J., et al., *Improved bone healing by angiogenic factor-enriched platelet-rich plasma and its synergistic enhancement by bone morphogenetic protein-2*. The International journal of oral & maxillofacial implants, 2008. **23**(5): p. 818-26.
159. Por, Y.C., et al., *Bone generation in the reconstruction of a critical size calvarial defect in an experimental model*. Annals of the Academy of Medicine, Singapore, 2007. **36**(11): p. 911-9.
160. Kempen, D.H., et al., *Enhanced bone morphogenetic protein-2-induced ectopic and orthotopic bone formation by intermittent parathyroid hormone (1-34) administration*. Tissue engineering. Part A, 2010. **16**(12): p. 3769-77.
161. Fan, J., et al., *Delivery of Phenamil Enhances BMP-2-Induced Osteogenic Differentiation of Adipose-Derived Stem Cells and Bone Formation in Calvarial Defects*. Tissue Eng Part A, 2015. **21**(13-14): p. 2053-65.
162. Holloway, J.L., et al., *Synergistic Effects of SDF-1alpha and BMP-2 Delivery from Proteolytically Degradable Hyaluronic Acid Hydrogels for Bone Repair*. Macromol Biosci, 2015. **15**(9): p. 1218-23.
163. Hwang, H.D., et al., *Sequential Treatment with SDF-1 and BMP-2 Potentiates Bone Formation in Calvarial Defects*. Tissue Eng Part A, 2015. **21**(13-14): p. 2125-35.
164. Lee, C.H., et al., *Effect of dual treatment with SDF-1 and BMP-2 on ectopic and orthotopic bone formation*. PLoS One, 2015. **10**(3): p. e0120051.
165. Thorey, F., et al., *Osseointegration by bone morphogenetic protein-2 and transforming growth factor beta2 coated titanium implants in femora of New Zealand white rabbits*. Indian journal of orthopaedics, 2011. **45**(1): p. 57-62.
166. Ramazanoglu, M., et al., *The effect of combined delivery of recombinant human bone morphogenetic protein-2 and recombinant human vascular endothelial growth factor 165 from biomimetic calcium-phosphate-coated implants on osseointegration*. Clinical oral implants research, 2011. **22**(12): p. 1433-9.
167. Patel, Z.S., et al., *Dual delivery of an angiogenic and an osteogenic growth factor for bone regeneration in a critical size defect model*. Bone, 2008. **43**(5): p. 931-40.
168. Lohse, N., et al., *Continuous delivery of rhBMP2 and rhVEGF165 at a certain ratio enhances bone formation in mandibular defects over the delivery of rhBMP2 alone - An experimental study in rats*. J Control Release, 2015. **220**(Pt A): p. 201-9.
169. Kempen, D.H., et al., *Effect of local sequential VEGF and BMP-2 delivery on ectopic and orthotopic bone regeneration*. Biomaterials, 2009. **30**(14): p. 2816-25.
170. Kroczek, A., et al., *Effects of osteoinduction on bone regeneration in distraction: results of a pilot study*. Journal of cranio-maxillo-facial surgery : official publication of the European Association for Cranio-Maxillo-Facial Surgery, 2010. **38**(5): p. 334-44.
171. Ishihara, A., et al., *Comparative efficacy of dermal fibroblast-mediated and direct adenoviral bone morphogenetic protein-2 gene therapy for bone regeneration in an equine rib model*. Gene therapy, 2010. **17**(6): p. 733-44.
172. Menendez, M.I., et al., *Direct delayed human adenoviral BMP-2 or BMP-6 gene therapy for bone and cartilage regeneration in a pony osteochondral model*. Osteoarthritis and cartilage / OARS, Osteoarthritis Research Society, 2011. **19**(8): p. 1066-75.
173. Alden, T.D., et al., *The use of bone morphogenetic protein gene therapy in craniofacial bone repair*. The Journal of craniofacial surgery, 2000. **11**(1): p. 24-30.
174. Gafni, Y., et al., *Gene therapy platform for bone regeneration using an exogenously regulated, AAV-2-based gene expression system*. Molecular therapy : the journal of the American Society of Gene Therapy, 2004. **9**(4): p. 587-95.
175. Uusitalo, H., et al., *Induction of periosteal callus formation by bone morphogenetic protein-2 employing adenovirus-mediated gene delivery*. Matrix biology : journal of the International Society for Matrix Biology, 2001. **20**(2): p. 123-7.
176. Hu, W.W., et al., *Bone regeneration in defects compromised by radiotherapy*. Journal of dental research, 2010. **89**(1): p. 77-81.

177. Santoni, B.G., et al., *Gene therapy to enhance allograft incorporation after host tissue irradiation*. Clinical orthopaedics and related research, 2008. **466**(8): p. 1921-9.
178. Betz, O.B., et al., *Delayed administration of adenoviral BMP-2 vector improves the formation of bone in osseous defects*. Gene therapy, 2007. **14**(13): p. 1039-44.
179. Hu, W.W., et al., *Localized viral vector delivery to enhance in situ regenerative gene therapy*. Gene therapy, 2007. **14**(11): p. 891-901.
180. Park, J., et al., *The effect on bone regeneration of a liposomal vector to deliver BMP-2 gene to bone grafts in peri-implant bone defects*. Biomaterials, 2007. **28**(17): p. 2772-82.
181. Egermann, M., et al., *Effect of BMP-2 gene transfer on bone healing in sheep*. Gene therapy, 2006. **13**(17): p. 1290-9.
182. Ashinoff, R.L., et al., *Bone morphogenetic protein-2 gene therapy for mandibular distraction osteogenesis*. Annals of plastic surgery, 2004. **52**(6): p. 585-90; discussion 591.
183. Ono, I., et al., *Combination of porous hydroxyapatite and cationic liposomes as a vector for BMP-2 gene therapy*. Biomaterials, 2004. **25**(19): p. 4709-18.
184. Uusitalo, H., et al., *Accelerated up-regulation of L-Sox5, Sox6, and Sox9 by BMP-2 gene transfer during murine fracture healing*. Journal of bone and mineral research : the official journal of the American Society for Bone and Mineral Research, 2001. **16**(10): p. 1837-45.
185. Lindsey, W.H., *Osseous tissue engineering with gene therapy for facial bone reconstruction*. The Laryngoscope, 2001. **111**(7): p. 1128-36.
186. Baltzer, A.W., et al., *Potential role of direct adenoviral gene transfer in enhancing fracture repair*. Clinical orthopaedics and related research, 2000(379 Suppl): p. S120-5.
187. Baltzer, A.W., et al., *Genetic enhancement of fracture repair: healing of an experimental segmental defect by adenoviral transfer of the BMP-2 gene*. Gene therapy, 2000. **7**(9): p. 734-9.
188. He, F.M., et al., *Bone formation at porous titanium implants coated with multiple layers of recombinant human bone morphogenetic protein-2 cDNA plasmid in the posterior mandible in dogs*. The International journal of oral & maxillofacial implants, 2013. **28**(6): p. 1648-54.
189. Lin, C.Y., et al., *The use of ASCs engineered to express BMP2 or TGF-beta3 within scaffold constructs to promote calvarial bone repair*. Biomaterials, 2013. **34**(37): p. 9401-12.
190. Betz, O.B., et al., *The repair of critical-sized bone defects using expedited, autologous BMP-2 gene-activated fat implants*. Tissue engineering. Part A, 2010. **16**(3): p. 1093-101.
191. Li, H., et al., *Bone regeneration by implantation of adipose-derived stromal cells expressing BMP-2*. Biochemical and biophysical research communications, 2007. **356**(4): p. 836-42.
192. Peterson, B., et al., *Healing of critically sized femoral defects, using genetically modified mesenchymal stem cells from human adipose tissue*. Tissue engineering, 2005. **11**(1-2): p. 120-9.
193. Liao, Y.H., et al., *Osteogenic differentiation of adipose-derived stem cells and calvarial defect repair using baculovirus-mediated co-expression of BMP-2 and miR-148b*. Biomaterials, 2014. **35**(18): p. 4901-10.
194. Feichtinger, G.A., et al., *Sonoporation increases therapeutic efficacy of inducible and constitutive BMP2/7 in vivo gene delivery*. Human gene therapy methods, 2014. **25**(1): p. 57-71.
195. Koh, J.T., et al., *Combinatorial gene therapy with BMP2/7 enhances cranial bone regeneration*. Journal of dental research, 2008. **87**(9): p. 845-9.
196. Tang, Y., et al., *Combination of bone tissue engineering and BMP-2 gene transfection promotes bone healing in osteoporotic rats*. Cell biology international, 2008. **32**(9): p. 1150-7.
197. Feeley, B.T., et al., *In vivo molecular imaging of adenoviral versus lentiviral gene therapy in two bone formation models*. Journal of orthopaedic research : official publication of the Orthopaedic Research Society, 2006. **24**(8): p. 1709-21.
198. Turgeman, G., et al., *Engineered human mesenchymal stem cells: a novel platform for skeletal cell mediated gene therapy*. The journal of gene medicine, 2001. **3**(3): p. 240-51.
199. Lieberman, J.R., et al., *Regional gene therapy with a BMP-2-producing murine stromal cell line induces heterotopic and orthotopic bone formation in rodents*. Journal of orthopaedic research : official publication of the Orthopaedic Research Society, 1998. **16**(3): p. 330-9.
200. Castro-Govea, Y., et al., *Human bone morphogenetic protein 2-transduced mesenchymal stem cells improve bone regeneration in a model of mandible distraction surgery*. The Journal of craniofacial surgery, 2012. **23**(2): p. 392-6.

201. Park, S.Y., et al., *The evaluation of the correlation between histomorphometric analysis and micro-computed tomography analysis in AdBMP-2 induced bone regeneration in rat calvarial defects*. Journal of periodontal & implant science, 2011. **41**(5): p. 218-26.
202. Dupont, K.M., et al., *Synthetic scaffold coating with adeno-associated virus encoding BMP2 to promote endogenous bone repair*. Cell and tissue research, 2012. **347**(3): p. 575-88.
203. Zhu, C., et al., *LvBMP-2 gene-modified BMSCs combined with calcium phosphate cement scaffolds for the repair of calvarial defects in rats*. Journal of materials science. Materials in medicine, 2011. **22**(8): p. 1965-73.
204. Virk, M.S., et al., *"Same day" ex-vivo regional gene therapy: a novel strategy to enhance bone repair*. Molecular therapy : the journal of the American Society of Gene Therapy, 2011. **19**(5): p. 960-8.
205. Long, J., et al., *Effects of bone morphogenetic protein 2 gene therapy on new bone formation during mandibular distraction osteogenesis at rapid rate in rabbits*. Oral surgery, oral medicine, oral pathology, oral radiology, and endodontics, 2011. **112**(1): p. 50-7.
206. Kallai, I., et al., *Quantitative, structural, and image-based mechanical analysis of nonunion fracture repaired by genetically engineered mesenchymal stem cells*. Journal of biomechanics, 2010. **43**(12): p. 2315-20.
207. Chang, S.C., et al., *Large-scale bicortical skull bone regeneration using ex vivo replication-defective adenoviral-mediated bone morphogenetic protein-2 gene-transferred bone marrow stromal cells and composite biomaterials*. Neurosurgery, 2009. **65**(6 Suppl): p. 75-81; discussion 81-3.
208. Zhao, J., et al., *Combination of beta-TCP and BMP-2 gene-modified bMSCs to heal critical size mandibular defects in rats*. Oral diseases, 2010. **16**(1): p. 46-54.
209. Yan, M.N., et al., *Reconstruction of peri-implant bone defects using impacted bone allograft and BMP-2 gene-modified bone marrow stromal cells*. Journal of biomedical materials research. Part A, 2010. **93**(1): p. 304-13.
210. Jiang, X., et al., *Mandibular repair in rats with premineralized silk scaffolds and BMP-2-modified bMSCs*. Biomaterials, 2009. **30**(27): p. 4522-32.
211. Chen, Y.L., et al., *Periodontal regeneration using ex vivo autologous stem cells engineered to express the BMP-2 gene: an alternative to alveoloplasty*. Gene therapy, 2008. **15**(22): p. 1469-77.
212. Steinhardt, Y., et al., *Maxillofacial-derived stem cells regenerate critical mandibular bone defect*. Tissue engineering. Part A, 2008. **14**(11): p. 1763-73.
213. Tai, K., et al., *Nanobiomechanics of repair bone regenerated by genetically modified mesenchymal stem cells*. Tissue engineering. Part A, 2008. **14**(10): p. 1709-20.
214. Virk, M.S., et al., *Influence of short-term adenoviral vector and prolonged lentiviral vector mediated bone morphogenetic protein-2 expression on the quality of bone repair in a rat femoral defect model*. Bone, 2008. **42**(5): p. 921-31.
215. Yue, B., et al., *BMP2 gene therapy on the repair of bone defects of aged rats*. Calcified tissue international, 2005. **77**(6): p. 395-403.
216. Zhang, X., et al., *Periosteal progenitor cell fate in segmental cortical bone graft transplantations: implications for functional tissue engineering*. Journal of bone and mineral research : the official journal of the American Society for Bone and Mineral Research, 2005. **20**(12): p. 2124-37.
217. Dai, K.R., et al., *Repairing of goat tibial bone defects with BMP-2 gene-modified tissue-engineered bone*. Calcified tissue international, 2005. **77**(1): p. 55-61.
218. Blum, J.S., et al., *In vivo evaluation of gene therapy vectors in ex vivo-derived marrow stromal cells for bone regeneration in a rat critical-size calvarial defect model*. Human gene therapy, 2003. **14**(18): p. 1689-701.
219. Chang, S.C., et al., *Ex vivo gene therapy in autologous critical-size craniofacial bone regeneration*. Plastic and reconstructive surgery, 2003. **112**(7): p. 1841-50.
220. Chang, S.C., et al., *Ex vivo gene therapy in autologous bone marrow stromal stem cells for tissue-engineered maxillofacial bone regeneration*. Gene therapy, 2003. **10**(24): p. 2013-9.
221. Park, J., et al., *Bone regeneration in critical size defects by cell-mediated BMP-2 gene transfer: a comparison of adenoviral vectors and liposomes*. Gene therapy, 2003. **10**(13): p. 1089-98.
222. Moutsatsos, I.K., et al., *Exogenously regulated stem cell-mediated gene therapy for bone regeneration*. Molecular therapy : the journal of the American Society of Gene Therapy, 2001. **3**(4): p. 449-61.
223. Gazit, D., et al., *Engineered pluripotent mesenchymal cells integrate and differentiate in regenerating bone: a novel cell-mediated gene therapy*. The journal of gene medicine, 1999. **1**(2): p. 121-33.

224. Lieberman, J.R., et al., *The effect of regional gene therapy with bone morphogenetic protein-2-producing bone-marrow cells on the repair of segmental femoral defects in rats*. The Journal of bone and joint surgery. American volume, 1999. **81**(7): p. 905-17.
225. Alaei, F., et al., *Suicide gene approach using a dual-expression lentiviral vector to enhance the safety of ex vivo gene therapy for bone repair*. Gene therapy, 2014. **21**(2): p. 139-47.
226. Jhin, M.J., et al., *Ex vivo bone morphogenetic protein-2 gene delivery using bone marrow stem cells in rabbit maxillary sinus augmentation in conjunction with implant placement*. Journal of periodontology, 2013. **84**(7): p. 985-94.
227. Jiang, X.Q., et al., *Maxillary sinus floor elevation using a tissue-engineered bone complex with beta-TCP and BMP-2 gene-modified bMSCs in rabbits*. Clin Oral Implants Res, 2009. **20**(12): p. 1333-40.
228. Park, S.Y., et al., *Dual delivery of rhPDGF-BB and bone marrow mesenchymal stromal cells expressing the BMP2 gene enhance bone formation in a critical-sized defect model*. Tissue engineering. Part A, 2013. **19**(21-22): p. 2495-505.
229. He, X., et al., *BMP2 genetically engineered MSCs and EPCs promote vascularized bone regeneration in rat critical-sized calvarial bone defects*. PloS one, 2013. **8**(4): p. e60473.
230. Wang, R., et al., *Autografts and xenografts of skin fibroblasts delivering BMP-2 effectively promote orthotopic and ectopic osteogenesis*. Anatomical record, 2009. **292**(6): p. 777-86.
231. Lee, J.Y., et al., *Enhancement of bone healing based on ex vivo gene therapy using human muscle-derived cells expressing bone morphogenetic protein 2*. Human gene therapy, 2002. **13**(10): p. 1201-11.
232. Lee, J.Y., et al., *Effect of bone morphogenetic protein-2-expressing muscle-derived cells on healing of critical-sized bone defects in mice*. The Journal of bone and joint surgery. American volume, 2001. **83-A**(7): p. 1032-9.
233. Day, C.S., et al., *Use of muscle cells to mediate gene transfer to the bone defect*. Tissue engineering, 1999. **5**(2): p. 119-25.
234. Park, S.Y., et al., *Ex vivo bone morphogenetic protein 2 gene delivery using periodontal ligament stem cells for enhanced re-osseointegration in the regenerative treatment of peri-implantitis*. J Biomed Mater Res A, 2014.
235. Wu, G., et al., *Effect of gene transfecting at different times on mandibular distraction osteogenesis*. The Journal of craniofacial surgery, 2013. **24**(1): p. 232-6.
236. Lin, X., et al., *Augmentation of osseous phenotypes in vivo with a synthetic peptide*. J Orthop Res, 2007. **25**(4): p. 531-9.
237. Ferreira, C.L., et al., *TGF-beta1 and BMP-4 carried by liposomes enhance the healing process in alveolar bone*. Archives of oral biology, 2013. **58**(6): p. 646-56.
238. Neudert, M., et al., *Osseointegration of titanium prostheses on the stapes footplate*. Journal of the Association for Research in Otolaryngology : JARO, 2010. **11**(2): p. 161-71.
239. Jung, U.W., et al., *The effect of varying the particle size of beta tricalcium phosphate carrier of recombinant human bone morphogenetic protein-4 on bone formation in rat calvarial defects*. Journal of periodontology, 2006. **77**(5): p. 765-72.
240. Ahn, S.H., et al., *Effect of recombinant human bone morphogenetic protein-4 with carriers in rat calvarial defects*. Journal of periodontology, 2003. **74**(6): p. 787-97.
241. Chen, J.C., et al., *rhBMP-4 gene therapy in a juvenile canine alveolar defect model*. Plastic and reconstructive surgery, 2007. **120**(6): p. 1503-9.
242. Huang, Y.C., et al., *Bone regeneration in a rat cranial defect with delivery of PEI-condensed plasmid DNA encoding for bone morphogenetic protein-4 (BMP-4)*. Gene therapy, 2005. **12**(5): p. 418-26.
243. Rundle, C.H., et al., *In vivo bone formation in fracture repair induced by direct retroviral-based gene therapy with bone morphogenetic protein-4*. Bone, 2003. **32**(6): p. 591-601.
244. Jiang, X., et al., *The use of tissue-engineered bone with human bone morphogenetic protein-4-modified bone-marrow stromal cells in repairing mandibular defects in rabbits*. International journal of oral and maxillofacial surgery, 2006. **35**(12): p. 1133-9.
245. Rose, T., et al., *The role of cell type in bone healing mediated by ex vivo gene therapy*. Langenbeck's archives of surgery / Deutsche Gesellschaft fur Chirurgie, 2003. **388**(5): p. 347-55.
246. Gysin, R., et al., *Ex vivo gene therapy with stromal cells transduced with a retroviral vector containing the BMP4 gene completely heals critical size calvarial defect in rats*. Gene therapy, 2002. **9**(15): p. 991-9.



247. Rose, T., et al., *Gene therapy to improve osteogenesis in bone lesions with severe soft tissue damage*. Langenbeck's archives of surgery / Deutsche Gesellschaft fur Chirurgie, 2003. **388**(5): p. 356-65.
248. Song, K., et al., *Identification of a key residue mediating bone morphogenetic protein (BMP)-6 resistance to noggin inhibition allows for engineered BMPs with superior agonist activity*. The Journal of biological chemistry, 2010. **285**(16): p. 12169-80.
249. Papanagiotou, M., et al., *Autologous (non-vascularised) fibular grafting with recombinant bone morphogenetic protein-7 for the treatment of femoral head osteonecrosis: preliminary report*. The bone & joint journal, 2014. **96-B**(1): p. 31-5.
250. Cloutier, M., et al., *Calvarial bone wound healing: a comparison between carbide and diamond drills, Er:YAG and Femtosecond lasers with or without BMP-7*. Oral surgery, oral medicine, oral pathology, oral radiology, and endodontics, 2010. **110**(6): p. 720-8.
251. Draenert, M.E., et al., *Primary cancellous bone formation with BMP and micro-chambered beads: experimental study on sheep*. Bone, 2013. **52**(1): p. 465-73.
252. Saran, N., R. Zhang, and R.E. Turcotte, *Osteogenic protein-1 delivered by hydroxyapatite-coated implants improves bone ingrowth in extracortical bone bridging*. Clinical orthopaedics and related research, 2011. **469**(5): p. 1470-8.
253. Gilley, R.S., et al., *OP-1 augments glucocorticoid-inhibited fracture healing in a rat fracture model*. Clinical orthopaedics and related research, 2009. **467**(12): p. 3104-12.
254. Kidder, L.S., et al., *Osteogenic protein-1 overcomes inhibition of fracture healing in the diabetic rat: a pilot study*. Clinical orthopaedics and related research, 2009. **467**(12): p. 3249-56.
255. Zhou, A.J., S.A. Peel, and C.M. Clokie, *An evaluation of hydroxyapatite and biphasic calcium phosphate in combination with Pluronic F127 and BMP on bone repair*. The Journal of craniofacial surgery, 2007. **18**(6): p. 1264-75.
256. Ristiniemi, J., et al., *RhBMP-7 accelerates the healing in distal tibial fractures treated by external fixation*. The Journal of bone and joint surgery. British volume, 2007. **89**(2): p. 265-72.
257. Jensen, T.B., et al., *Osteogenic protein-1 increases the fixation of implants grafted with morcellised bone allograft and ProOsteon bone substitute: an experimental study in dogs*. The Journal of bone and joint surgery. British volume, 2007. **89**(1): p. 121-6.
258. Mandu-Hrit, M., et al., *Early injection of OP-1 during distraction osteogenesis accelerates new bone formation in rabbits*. Growth Factors, 2006. **24**(3): p. 172-83.
259. Zakhary, K., et al., *Effect of recombinant human bone morphogenetic protein 7 on bone density during distraction osteogenesis of the rabbit mandible*. The Journal of otolaryngology, 2005. **34**(6): p. 407-14.
260. Zhang, R., et al., *Osteogenic protein-1 enhances osseointegration of titanium implants coated with periapatite in rabbit femoral defect*. Journal of biomedical materials research. Part B, Applied biomaterials, 2004. **71**(2): p. 408-13.
261. Roldan, J.C., et al., *Bone formation in the presence of platelet-rich plasma vs. bone morphogenetic protein-7*. Bone, 2004. **34**(1): p. 80-90.
262. Corinaldesi, G., et al., *Augmentation of the floor of the maxillary sinus with recombinant human bone morphogenetic protein-7: a pilot radiological and histological study in humans*. The British journal of oral & maxillofacial surgery, 2013. **51**(3): p. 247-52.
263. Phillips, F.M., et al., *In vivo BMP-7 (OP-1) enhancement of osteoporotic vertebral bodies in an ovine model*. The spine journal : official journal of the North American Spine Society, 2006. **6**(5): p. 500-6.
264. Calori, G.M., et al., *Application of rhBMP-7 and platelet-rich plasma in the treatment of long bone non-unions: a prospective randomised clinical study on 120 patients*. Injury, 2008. **39**(12): p. 1391-402.
265. Calori, G.M., et al., *An ongoing research for evaluation of treatment with BMPs or AGFs in long bone non-union: protocol description and preliminary results*. Injury, 2006. **37 Suppl 3**: p. S43-50.
266. Kanakaris, N.K., et al., *Application of bone morphogenetic proteins to femoral non-unions: a 4-year multicentre experience*. Injury, 2009. **40 Suppl 3**: p. S54-61.
267. Giannoudis, P.V., et al., *The synergistic effect of autograft and BMP-7 in the treatment of atrophic nonunions*. Clin Orthop Relat Res, 2009. **467**(12): p. 3239-48.
268. Kanakaris, N.K., et al., *Application of BMP-7 to tibial non-unions: a 3-year multicenter experience*. Injury, 2008. **39 Suppl 2**: p. S83-90.
269. Ekrol, I., et al., *A comparison of RhBMP-7 (OP-1) and autogenous graft for metaphyseal defects after osteotomy of the distal radius*. Injury, 2008. **39 Suppl 2**: p. S73-82.
270. Bong, M.R., et al., *Osteogenic protein-1 (bone morphogenetic protein-7) combined with various adjuncts in the treatment of humeral diaphyseal nonunions*. Bull Hosp Jt Dis, 2005. **63**(1-2): p. 20-3.

271. Lee, F.Y., et al., *Treatment of congenital pseudarthrosis of the tibia with recombinant human bone morphogenetic protein-7 (rhBMP-7). A report of five cases.* J Bone Joint Surg Am, 2006. **88**(3): p. 627-33.
272. Bilic, R., et al., *Osteogenic protein-1 (BMP-7) accelerates healing of scaphoid non-union with proximal pole sclerosis.* Int Orthop, 2006. **30**(2): p. 128-34.
273. Geesink, R.G., N.H. Hoefnagels, and S.K. Bulstra, *Osteogenic activity of OP-1 bone morphogenetic protein (BMP-7) in a human fibular defect.* J Bone Joint Surg Br, 1999. **81**(4): p. 710-8.
274. van den Bergh, J.P., et al., *Recombinant human bone morphogenetic protein-7 in maxillary sinus floor elevation surgery in 3 patients compared to autogenous bone grafts. A clinical pilot study.* J Clin Periodontol, 2000. **27**(9): p. 627-36.
275. Groeneveld, E.H., et al., *Histomorphometrical analysis of bone formed in human maxillary sinus floor elevations grafted with OP-1 device, demineralized bone matrix or autogenous bone. Comparison with non-grafted sites in a series of case reports.* Clin Oral Implants Res, 1999. **10**(6): p. 499-509.
276. Tan, H.C., et al., *Anti-fibrosis effect of BMP-7 peptide functionalization on cobalt chromium alloy.* J Orthop Res, 2013. **31**(6): p. 983-90.
277. Takigami, H., et al., *Bone formation following OP-1 implantation is improved by addition of autogenous bone marrow cells in a canine femur defect model.* Journal of orthopaedic research : official publication of the Orthopaedic Research Society, 2007. **25**(10): p. 1333-42.
278. Liao, J.C., et al., *Enhancement of recombinant human BMP-7 bone formation with bmp binding peptide in a rodent femoral defect model.* Journal of orthopaedic research : official publication of the Orthopaedic Research Society, 2011. **29**(5): p. 753-9.
279. Morgan, E.F., et al., *Combined effects of recombinant human BMP-7 (rhBMP-7) and parathyroid hormone (1-34) in metaphyseal bone healing.* Bone, 2008. **43**(6): p. 1031-8.
280. Im, G.I. and J.H. Lee, *Repair of osteochondral defects with adipose stem cells and a dual growth factor-releasing scaffold in rabbits.* Journal of biomedical materials research. Part B, Applied biomaterials, 2010. **92**(2): p. 552-60.
281. Little, D.G., et al., *Manipulation of the anabolic and catabolic responses with OP-1 and zoledronic acid in a rat critical defect model.* Journal of bone and mineral research : the official journal of the American Society for Bone and Mineral Research, 2005. **20**(11): p. 2044-52.
282. Zhang, Y., et al., *Synthesis and inflammatory response of a novel silk fibroin scaffold containing BMP7 adenovirus for bone regeneration.* Bone, 2012. **51**(4): p. 704-13.
283. Zhang, Y., et al., *In vitro and in vivo evaluation of adenovirus combined silk fibroin scaffolds for BMP-7 gene delivery.* Tissue engineering. Part C, Methods, 2011.
284. Dunn, C.A., et al., *BMP gene delivery for alveolar bone engineering at dental implant defects.* Molecular therapy : the journal of the American Society of Gene Therapy, 2005. **11**(2): p. 294-9.
285. Hu, J., et al., *Callus formation enhanced by BMP-7 ex vivo gene therapy during distraction osteogenesis in rats.* Journal of orthopaedic research : official publication of the Orthopaedic Research Society, 2007. **25**(2): p. 241-51.
286. Nussenbaum, B., R.B. Rutherford, and P.H. Krebsbach, *Bone regeneration in cranial defects previously treated with radiation.* The Laryngoscope, 2005. **115**(7): p. 1170-7.
287. Nussenbaum, B., et al., *Ex vivo gene therapy for skeletal regeneration in cranial defects compromised by postoperative radiotherapy.* Human gene therapy, 2003. **14**(11): p. 1107-15.
288. Jin, Q.M., et al., *Gene therapy of bone morphogenetic protein for periodontal tissue engineering.* Journal of periodontology, 2003. **74**(2): p. 202-13.
289. Rutherford, R.B., et al., *Bone morphogenetic protein-transduced human fibroblasts convert to osteoblasts and form bone in vivo.* Tissue engineering, 2002. **8**(3): p. 441-52.
290. Krebsbach, P.H., et al., *Gene therapy-directed osteogenesis: BMP-7-transduced human fibroblasts form bone in vivo.* Human gene therapy, 2000. **11**(8): p. 1201-10.
291. Zhang, Y., et al., *Delivery of PDGF-B and BMP-7 by mesoporous bioglass/silk fibrin scaffolds for the repair of osteoporotic defects.* Biomaterials, 2012. **33**(28): p. 6698-708.
292. Breitbart, A.S., et al., *Gene-enhanced tissue engineering: applications for bone healing using cultured periosteal cells transduced retrovirally with the BMP-7 gene.* Annals of plastic surgery, 1999. **42**(5): p. 488-95.
293. Kimelman-Bleich, N., et al., *Targeted gene-and-host progenitor cell therapy for nonunion bone fracture repair.* Molecular therapy : the journal of the American Society of Gene Therapy, 2011. **19**(1): p. 53-9.

294. Stavropoulos, A., et al., *A phase IIa randomized controlled clinical and histological pilot study evaluating rhGDF-5/beta-TCP for periodontal regeneration*. J Clin Periodontol, 2011. **38**(11): p. 1044-54.
295. Windisch, P., et al., *A phase IIa randomized controlled pilot study evaluating the safety and clinical outcomes following the use of rhGDF-5/beta-TCP in regenerative periodontal therapy*. Clin Oral Investig, 2012. **16**(4): p. 1181-9.
296. Stavropoulos, A., et al., *Histological evaluation of maxillary sinus floor augmentation with recombinant human growth and differentiation factor-5-coated beta-tricalcium phosphate: results of a multicenter randomized clinical trial*. J Clin Periodontol, 2011. **38**(10): p. 966-74.
297. Koch, F.P., et al., *A prospective, randomized pilot study on the safety and efficacy of recombinant human growth and differentiation factor-5 coated onto beta-tricalcium phosphate for sinus lift augmentation*. Clin Oral Implants Res, 2010. **21**(11): p. 1301-8.
298. Kleinschmidt, K., et al., *Superior angiogenic potential of GDF-5 and GDF-5(V453/V456) compared with BMP-2 in a rabbit long-bone defect model*. J Bone Joint Surg Am, 2014. **96**(20): p. 1699-707.
299. Degenkolbe, E., et al., *Improved bone defect healing by a superagonistic GDF5 variant derived from a patient with multiple synostoses syndrome*. Bone, 2015. **73**: p. 111-9.
300. Wan, D.C., et al., *Noggin suppression enhances in vitro osteogenesis and accelerates in vivo bone formation*. The Journal of biological chemistry, 2007. **282**(36): p. 26450-9.
301. Levi, B., et al., *Nonintegrating knockdown and customized scaffold design enhances human adipose-derived stem cells in skeletal repair*. Stem cells, 2011. **29**(12): p. 2018-29.
302. Levi, B., et al., *Enhancement of human adipose-derived stromal cell angiogenesis through knockdown of a BMP-2 inhibitor*. Plastic and reconstructive surgery, 2012. **129**(1): p. 53-66.
303. Lee, J.Y., et al., *Synthetic peptide-coated bone mineral for enhanced osteoblastic activation in vitro and in vivo*. J Biomed Mater Res A, 2008. **87**(3): p. 688-97.
304. Lee, J., et al., *SDF-1alpha/CXCR4 signaling mediates digit tip regeneration promoted by BMP-2*. Developmental biology, 2013. **382**(1): p. 98-109.
305. Ide, H., *Bone pattern formation in mouse limbs after amputation at the forearm level*. Developmental dynamics : an official publication of the American Association of Anatomists, 2012. **241**(3): p. 435-41.
306. Ren, W.H., L.J. Yang, and S.Z. Dong, *Induction of reparative dentin formation in dogs with combined recombinant human bone morphogenetic protein 2 and fibrin sealant*. The Chinese journal of dental research : the official journal of the Scientific Section of the Chinese Stomatological Association, 1999. **2**(3-4): p. 21-4.
307. Chung, I.H., et al., *Regulating the role of bone morphogenetic protein 4 in tooth bioengineering*. Journal of oral and maxillofacial surgery : official journal of the American Association of Oral and Maxillofacial Surgeons, 2007. **65**(3): p. 501-7.
308. Cooper, G.M., et al., *Noggin inhibits postoperative resynostosis in craniosynostotic rabbits*. Journal of bone and mineral research : the official journal of the American Society for Bone and Mineral Research, 2007. **22**(7): p. 1046-54.
309. Cray, J., Jr., et al., *Blocking bone morphogenetic protein function using in vivo noggin therapy does not rescue premature suture fusion in rabbits with delayed-onset craniosynostosis*. Plastic and reconstructive surgery, 2011. **127**(3): p. 1163-72.
310. Cooper, G.M., et al., *Ex vivo Noggin gene therapy inhibits bone formation in a mouse model of postoperative resynostosis*. Plast Reconstr Surg, 2009. **123**(2 Suppl): p. 94S-103S.
311. Kaplan, J., F.S. Kaplan, and E.M. Shore, *Restoration of normal BMP signaling levels and osteogenic differentiation in FOP mesenchymal progenitor cells by mutant allele-specific targeting*. Gene therapy, 2012. **19**(7): p. 786-90.
312. Takahashi, M., et al., *Disease-causing allele-specific silencing against the ALK2 mutants, R206H and G356D, in fibrodysplasia ossificans progressiva*. Gene therapy, 2012. **19**(7): p. 781-5.
313. Toyoda, H., et al., *Augmentation of bone morphogenetic protein-induced bone mass by local delivery of a prostaglandin E EP4 receptor agonist*. Bone, 2005. **37**(4): p. 555-62.
314. Sasaoka, R., et al., *A prostanoid receptor EP4 agonist enhances ectopic bone formation induced by recombinant human bone morphogenetic protein-2*. Biochem Biophys Res Commun, 2004. **318**(3): p. 704-9.
315. Nakamura, Y., et al., *Low dose fibroblast growth factor-2 (FGF-2) enhances bone morphogenetic protein-2 (BMP-2)-induced ectopic bone formation in mice*. Bone, 2005. **36**(3): p. 399-407.

316. Zhao, B., et al., *Heparin potentiates the in vivo ectopic bone formation induced by bone morphogenetic protein-2*. J Biol Chem, 2006. **281**(32): p. 23246-53.
317. Horiuchi, H., et al., *Effect of phosphodiesterase inhibitor-4, rolipram, on new bone formations by recombinant human bone morphogenetic protein-2*. Bone, 2002. **30**(4): p. 589-93.
318. Horiuchi, H., et al., *Enhancement of bone morphogenetic protein-2-induced new bone formation in mice by the phosphodiesterase inhibitor pentoxifylline*. Bone, 2001. **28**(3): p. 290-4.
319. Tokuhara, Y., et al., *Local delivery of rolipram, a phosphodiesterase-4-specific inhibitor, augments bone morphogenetic protein-induced bone formation*. J Bone Miner Metab, 2010. **28**(1): p. 17-24.
320. Schindeler, A., et al., *Rapid cell culture and pre-clinical screening of a transforming growth factor-beta (TGF-beta) inhibitor for orthopaedics*. BMC Musculoskelet Disord, 2010. **11**: p. 105.
321. Brochmann, E.J., et al., *Carboxy terminus of secreted phosphoprotein-24 kDa (spp24) is essential for full inhibition of BMP-2 activity*. J Orthop Res, 2010. **28**(9): p. 1200-7.
322. Sintuu, C., et al., *Full-length bovine spp24 [spp24 (24-203)] inhibits BMP-2 induced bone formation*. J Orthop Res, 2008. **26**(6): p. 753-8.
323. Mori, S., et al., *Antiangiogenic agent (TNP-470) inhibition of ectopic bone formation induced by bone morphogenetic protein-2*. Bone, 1998. **22**(2): p. 99-105.
324. Yoshikawa, H., et al., *Stimulation of ectopic bone formation in response to BMP-2 by Rho kinase inhibitor: a pilot study*. Clin Orthop Relat Res, 2009. **467**(12): p. 3087-95.
325. Zhao, M., et al., *Combinatorial gene therapy for bone regeneration: cooperative interactions between adenovirus vectors expressing bone morphogenetic proteins 2, 4, and 7*. J Cell Biochem, 2005. **95**(1): p. 1-16.
326. Kaihara, S., et al., *Simple and effective osteoinductive gene therapy by local injection of a bone morphogenetic protein-2-expressing recombinant adenoviral vector and FK506 mixture in rats*. Gene Ther, 2004. **11**(5): p. 439-47.
327. Hannallah, D., et al., *Retroviral delivery of Noggin inhibits the formation of heterotopic ossification induced by BMP-4, demineralized bone matrix, and trauma in an animal model*. J Bone Joint Surg Am, 2004. **86-A**(1): p. 80-91.
328. Lee, S.J., et al., *Enhancement of bone regeneration by gene delivery of BMP2/Runx2 bicistronic vector into adipose-derived stromal cells*. Biomaterials, 2010. **31**(21): p. 5652-9.
329. Samee, M., et al., *Bone morphogenetic protein-2 (BMP-2) and vascular endothelial growth factor (VEGF) transfection to human periosteal cells enhances osteoblast differentiation and bone formation*. J Pharmacol Sci, 2008. **108**(1): p. 18-31.
330. Huang, Y.C., et al., *Combined angiogenic and osteogenic factor delivery enhances bone marrow stromal cell-driven bone regeneration*. J Bone Miner Res, 2005. **20**(5): p. 848-57.
331. Yu, P.B., et al., *BMP type I receptor inhibition reduces heterotopic [corrected] ossification*. Nat Med, 2008. **14**(12): p. 1363-9.
332. Peterson, J.R., et al., *Treatment of heterotopic ossification through remote ATP hydrolysis*. Sci Transl Med, 2014. **6**(255): p. 255ra132.
333. Mohedas, A.H., et al., *Development of an ALK2-biased BMP type I receptor kinase inhibitor*. ACS Chem Biol, 2013. **8**(6): p. 1291-302.
334. Glaser, D.L., et al., *In vivo somatic cell gene transfer of an engineered Noggin mutein prevents BMP4-induced heterotopic ossification*. J Bone Joint Surg Am, 2003. **85-A**(12): p. 2332-42.
335. Yamamoto, R., et al., *Clinically applicable antiangiogenic agents suppress osteoblastic transformation of myogenic cells and heterotopic ossifications in mice*. J Bone Miner Metab, 2013. **31**(1): p. 26-33.
336. Shimono, K., et al., *Potent inhibition of heterotopic ossification by nuclear retinoic acid receptor-gamma agonists*. Nat Med, 2011. **17**(4): p. 454-60.
337. Leckie, S.K., et al., *Injection of AAV2-BMP2 and AAV2-TIMP1 into the nucleus pulposus slows the course of intervertebral disc degeneration in an in vivo rabbit model*. Spine J, 2012. **12**(1): p. 7-20.
338. Di Cesare, P.E., et al., *Regional gene therapy for full-thickness articular cartilage lesions using naked DNA with a collagen matrix*. J Orthop Res, 2006. **24**(5): p. 1118-27.
339. Kawakami, M., et al., *Osteogenic protein-1 (osteogenic protein-1/bone morphogenetic protein-7) inhibits degeneration and pain-related behavior induced by chronically compressed nucleus pulposus in the rat*. Spine (Phila Pa 1976), 2005. **30**(17): p. 1933-9.
340. Che, J.H., et al., *Application of tissue-engineered cartilage with BMP-7 gene to repair knee joint cartilage injury in rabbits*. Knee Surg Sports Traumatol Arthrosc, 2010. **18**(4): p. 496-503.

341. Chaofeng, W., et al., *Nucleus pulposus cells expressing hBMP7 can prevent the degeneration of allogenic IVD in a canine transplantation model*. J Orthop Res, 2013. **31**(9): p. 1366-73.
342. Chujo, T., et al., *Effects of growth differentiation factor-5 on the intervertebral disc--in vitro bovine study and in vivo rabbit disc degeneration model study*. Spine (Phila Pa 1976), 2006. **31**(25): p. 2909-17.
343. Fourman, M.S., et al., *Recombinant human BMP-2 increases the incidence and rate of healing in complex ankle arthrodesis*. Clinical orthopaedics and related research, 2014. **472**(2): p. 732-9.
344. Majid, K., et al., *Biomimetic calcium phosphate coatings as bone morphogenetic protein delivery systems in spinal fusion*. The spine journal : official journal of the North American Spine Society, 2011. **11**(6): p. 560-7.
345. Helm, G.A., et al., *Utilization of type I collagen gel, demineralized bone matrix, and bone morphogenetic protein-2 to enhance autologous bone lumbar spinal fusion*. Journal of neurosurgery, 1997. **86**(1): p. 93-100.
346. Meyer, R.A., Jr., et al., *Safety of recombinant human bone morphogenetic protein-2 after spinal laminectomy in the dog*. Spine, 1999. **24**(8): p. 747-54.
347. David, S.M., et al., *Lumbar spinal fusion using recombinant human bone morphogenetic protein in the canine. A comparison of three dosages and two carriers*. Spine, 1999. **24**(19): p. 1973-9.
348. Martin, G.J., Jr., S.D. Boden, and L. Titus, *Recombinant human bone morphogenetic protein-2 overcomes the inhibitory effect of ketorolac, a nonsteroidal anti-inflammatory drug (NSAID), on posterolateral lumbar intertransverse process spine fusion*. Spine, 1999. **24**(21): p. 2188-93; discussion 2193-4.
349. Sandhu, H.S., et al., *Histologic evaluation of the efficacy of rhBMP-2 compared with autograft bone in sheep spinal anterior interbody fusion*. Spine, 2002. **27**(6): p. 567-75.
350. Akamaru, T., et al., *Simple carrier matrix modifications can enhance delivery of recombinant human bone morphogenetic protein-2 for posterolateral spine fusion*. Spine, 2003. **28**(5): p. 429-34.
351. Zhang, H., D.J. Sucato, and R.D. Welch, *Recombinant human bone morphogenetic protein-2-enhanced anterior spine fusion without bone encroachment into the spinal canal: a histomorphometric study in a thoracoscopically instrumented porcine model*. Spine, 2005. **30**(5): p. 512-8.
352. Glassman, S.D., et al., *The efficacy of rhBMP-2 for posterolateral lumbar fusion in smokers*. Spine, 2007. **32**(15): p. 1693-8.
353. Oluigbo, C.O. and G.A. Solanki, *Use of recombinant human bone morphogenetic protein-2 to enhance posterior cervical spine fusion at 2 years of age: technical note*. Pediatric neurosurgery, 2008. **44**(5): p. 393-6.
354. Miyazaki, M., et al., *A porcine collagen-derived matrix as a carrier for recombinant human bone morphogenetic protein-2 enhances spinal fusion in rats*. The spine journal : official journal of the North American Spine Society, 2009. **9**(1): p. 22-30.
355. Shen, H.X., et al., *Pseudarthrosis in multilevel anterior cervical fusion with rhBMP-2 and allograft: analysis of one hundred twenty-seven cases with minimum two-year follow-up*. Spine, 2010. **35**(7): p. 747-53.
356. Xu, R., et al., *Safety and efficacy of rhBMP2 in posterior cervical spinal fusion for subaxial degenerative spine disease: Analysis of outcomes in 204 patients*. Surgical neurology international, 2011. **2**: p. 109.
357. Williams, B.J., et al., *Does bone morphogenetic protein increase the incidence of perioperative complications in spinal fusion? A comparison of 55,862 cases of spinal fusion with and without bone morphogenetic protein*. Spine, 2011. **36**(20): p. 1685-91.
358. Koo, K.H., et al., *Lumbar posterolateral fusion using heparin-conjugated fibrin for sustained delivery of bone morphogenetic protein-2 in a rabbit model*. Artificial organs, 2012. **36**(7): p. 629-34.
359. Wang, M., et al., *Minimizing the severity of rhBMP-2-induced inflammation and heterotopic ossification with a polyelectrolyte carrier incorporating heparin on microbead templates*. Spine, 2013. **38**(17): p. 1452-8.
360. Koo, K.H., et al., *Controlled delivery of low-dose bone morphogenetic protein-2 using heparin-conjugated fibrin in the posterolateral lumbar fusion of rabbits*. Artificial organs, 2013. **37**(5): p. 487-94.
361. Flouzat-Lachaniette, C.H., et al., *Bone union rate with recombinant human bone morphogenetic protein-2 versus autologous iliac bone in PEEK cages for anterior lumbar interbody fusion*. International orthopaedics, 2014.
362. Wang, H., et al., *Osteoinductive activity of ErhBMP-2 after anterior cervical discectomy and fusion with a ss-TCP interbody cage in a goat model*. Orthopedics, 2014. **37**(2): p. e123-31.

363. Lee, S.S., et al., *Gel Scaffolds of BMP-2-Binding Peptide Amphiphile Nanofibers for Spinal Arthrodesis*. Advanced healthcare materials, 2014.
364. Roh, J.S., et al., *Allogeneic morphogenetic protein vs. recombinant human bone morphogenetic protein-2 in lumbar interbody fusion procedures: a radiographic and economic analysis*. J Orthop Surg Res, 2013. **8**: p. 49.
365. Pimenta, L., et al., *A prospective, randomized, controlled trial comparing radiographic and clinical outcomes between stand-alone lateral interbody lumbar fusion with either silicate calcium phosphate or rh-BMP2*. J Neurol Surg A Cent Eur Neurosurg, 2013. **74**(6): p. 343-50.
366. Hodges, S.D., J.C. Eck, and D. Newton, *Retrospective study of posterior cervical fusions with rhBMP-2*. Orthopedics, 2012. **35**(6): p. e895-8.
367. Sethi, A., et al., *Radiographic and CT evaluation of recombinant human bone morphogenetic protein-2-assisted spinal interbody fusion*. AJR Am J Roentgenol, 2011. **197**(1): p. W128-33.
368. Singh, K., et al., *Repeat use of human recombinant bone morphogenetic protein-2 for second level lumbar arthrodesis*. Spine (Phila Pa 1976), 2011. **36**(3): p. 192-6.
369. Rogozinski, A., C. Rogozinski, and G. Cloud, *Accelerating autograft maturation in instrumented posterolateral lumbar spinal fusions without donor site morbidity*. Orthopedics, 2009. **32**(11): p. 809.
370. Dawson, E., et al., *Recombinant human bone morphogenetic protein-2 on an absorbable collagen sponge with an osteoconductive bulking agent in posterolateral arthrodesis with instrumentation. A prospective randomized trial*. J Bone Joint Surg Am, 2009. **91**(7): p. 1604-13.
371. Dimar, J.R., 2nd, et al., *Clinical and radiographic analysis of an optimized rhBMP-2 formulation as an autograft replacement in posterolateral lumbar spine arthrodesis*. J Bone Joint Surg Am, 2009. **91**(6): p. 1377-86.
372. Burkus, J.K., et al., *Six-year outcomes of anterior lumbar interbody arthrodesis with use of interbody fusion cages and recombinant human bone morphogenetic protein-2*. J Bone Joint Surg Am, 2009. **91**(5): p. 1181-9.
373. Carreon, L.Y., et al., *RhBMP-2 versus iliac crest bone graft for lumbar spine fusion in patients over 60 years of age: a cost-utility study*. Spine (Phila Pa 1976), 2009. **34**(3): p. 238-43.
374. Glassman, S.D., et al., *RhBMP-2 versus iliac crest bone graft for lumbar spine fusion: a randomized, controlled trial in patients over sixty years of age*. Spine (Phila Pa 1976), 2008. **33**(26): p. 2843-9.
375. Vaidya, R., et al., *Complications in the use of rhBMP-2 in PEEK cages for interbody spinal fusions*. J Spinal Disord Tech, 2008. **21**(8): p. 557-62.
376. Meisel, H.J., et al., *Posterior lumbar interbody fusion using rhBMP-2*. Eur Spine J, 2008. **17**(12): p. 1735-44.
377. Mulconrey, D.S., et al., *Bone morphogenetic protein (RhBMP-2) as a substitute for iliac crest bone graft in multilevel adult spinal deformity surgery: minimum two-year evaluation of fusion*. Spine (Phila Pa 1976), 2008. **33**(20): p. 2153-9.
378. Katayama, Y., et al., *Clinical and radiographic outcomes of posterolateral lumbar spine fusion in humans using recombinant human bone morphogenetic protein-2: an average five-year follow-up study*. Int Orthop, 2009. **33**(4): p. 1061-7.
379. Buttermann, G.R., *Prospective nonrandomized comparison of an allograft with bone morphogenic protein versus an iliac-crest autograft in anterior cervical discectomy and fusion*. Spine J, 2008. **8**(3): p. 426-35.
380. Slosar, P.J., R. Josey, and J. Reynolds, *Accelerating lumbar fusions by combining rhBMP-2 with allograft bone: a prospective analysis of interbody fusion rates and clinical outcomes*. Spine J, 2007. **7**(3): p. 301-7.
381. Smucker, J.D., et al., *Increased swelling complications associated with off-label usage of rhBMP-2 in the anterior cervical spine*. Spine (Phila Pa 1976), 2006. **31**(24): p. 2813-9.
382. Dimar, J.R., et al., *Clinical outcomes and fusion success at 2 years of single-level instrumented posterolateral fusions with recombinant human bone morphogenetic protein-2/compression resistant matrix versus iliac crest bone graft*. Spine (Phila Pa 1976), 2006. **31**(22): p. 2534-9; discussion 2540.
383. Anand, N., et al., *Cantilever TLIF with structural allograft and RhBMP2 for correction and maintenance of segmental sagittal lordosis: long-term clinical, radiographic, and functional outcome*. Spine (Phila Pa 1976), 2006. **31**(20): p. E748-53.
384. Burkus, J.K., H.S. Sandhu, and M.F. Gornet, *Influence of rhBMP-2 on the healing patterns associated with allograft interbody constructs in comparison with autograft*. Spine (Phila Pa 1976), 2006. **31**(7): p. 775-81.

385. Villavicencio, A.T., et al., *Safety of transforaminal lumbar interbody fusion and intervertebral recombinant human bone morphogenetic protein-2*. J Neurosurg Spine, 2005. **3**(6): p. 436-43.
386. Luhmann, S.J., et al., *Use of bone morphogenetic protein-2 for adult spinal deformity*. Spine (Phila Pa 1976), 2005. **30**(17 Suppl): p. S110-7.
387. Glassman, S.D., et al., *Initial fusion rates with recombinant human bone morphogenetic protein-2/compression resistant matrix and a hydroxyapatite and tricalcium phosphate/collagen carrier in posterolateral spinal fusion*. Spine (Phila Pa 1976), 2005. **30**(15): p. 1694-8.
388. Boakye, M., et al., *Anterior cervical discectomy and fusion involving a polyetheretherketone spacer and bone morphogenetic protein*. J Neurosurg Spine, 2005. **2**(5): p. 521-5.
389. Burkus, J.K., et al., *Use of rhBMP-2 in combination with structural cortical allografts: clinical and radiographic outcomes in anterior lumbar spinal surgery*. J Bone Joint Surg Am, 2005. **87**(6): p. 1205-12.
390. Haid, R.W., Jr., et al., *Posterior lumbar interbody fusion using recombinant human bone morphogenetic protein type 2 with cylindrical interbody cages*. Spine J, 2004. **4**(5): p. 527-38; discussion 538-9.
391. Mummaneni, P.V., et al., *Contribution of recombinant human bone morphogenetic protein-2 to the rapid creation of interbody fusion when used in transforaminal lumbar interbody fusion: a preliminary report. Invited submission from the Joint Section Meeting on Disorders of the Spine and Peripheral Nerves, March 2004*. J Neurosurg Spine, 2004. **1**(1): p. 19-23.
392. Kuklo, T.R., M.K. Rosner, and D.W. Polly, Jr., *Computerized tomography evaluation of a resorbable implant after transforaminal lumbar interbody fusion*. Neurosurg Focus, 2004. **16**(3): p. E10.
393. Lanman, T.H. and T.J. Hopkins, *Lumbar interbody fusion after treatment with recombinant human bone morphogenetic protein-2 added to poly(L-lactide-co-D,L-lactide) bioresorbable implants*. Neurosurg Focus, 2004. **16**(3): p. E9.
394. Baskin, D.S., et al., *A prospective, randomized, controlled cervical fusion study using recombinant human bone morphogenetic protein-2 with the CORNERSTONE-SR allograft ring and the ATLANTIS anterior cervical plate*. Spine (Phila Pa 1976), 2003. **28**(12): p. 1219-24; discussion 1225.
395. Burkus, J.K., J.D. Dorchak, and D.L. Sanders, *Radiographic assessment of interbody fusion using recombinant human bone morphogenetic protein type 2*. Spine (Phila Pa 1976), 2003. **28**(4): p. 372-7.
396. Boden, S.D., et al., *Use of recombinant human bone morphogenetic protein-2 to achieve posterolateral lumbar spine fusion in humans: a prospective, randomized clinical pilot trial: 2002 Volvo Award in clinical studies*. Spine (Phila Pa 1976), 2002. **27**(23): p. 2662-73.
397. Burkus, J.K., et al., *Clinical and radiographic outcomes of anterior lumbar interbody fusion using recombinant human bone morphogenetic protein-2*. Spine (Phila Pa 1976), 2002. **27**(21): p. 2396-408.
398. Burkus, J.K., et al., *Anterior lumbar interbody fusion using rhBMP-2 with tapered interbody cages*. J Spinal Disord Tech, 2002. **15**(5): p. 337-49.
399. Boden, S.D., et al., *The use of rhBMP-2 in interbody fusion cages. Definitive evidence of osteoinduction in humans: a preliminary report*. Spine (Phila Pa 1976), 2000. **25**(3): p. 376-81.
400. Corenman, D.S., et al., *Recombinant human bone morphogenetic protein-2-augmented transforaminal lumbar interbody fusion for the treatment of chronic low back pain secondary to the homogeneous diagnosis of discogenic pain syndrome: two-year outcomes*. Spine (Phila Pa 1976), 2013. **38**(20): p. E1269-77.
401. Michielsen, J., et al., *The effect of recombinant human bone morphogenetic protein-2 in single-level posterior lumbar interbody arthrodesis*. J Bone Joint Surg Am, 2013. **95**(10): p. 873-80.
402. Kaito, T., et al., *Synergistic effect of bone morphogenetic proteins 2 and 7 by ex vivo gene therapy in a rat spinal fusion model*. The Journal of bone and joint surgery. American volume, 2013. **95**(17): p. 1612-9.
403. Refaat, M., et al., *Binding to COMP Reduces the BMP2 Dose for Spinal Fusion in a Rat Model*. Spine (Phila Pa 1976), 2015.
404. Morimoto, T., et al., *Effect of Intermittent Administration of Teriparatide (Parathyroid Hormone 1-34) on Bone Morphogenetic Protein-Induced Bone Formation in a Rat Model of Spinal Fusion*. J Bone Joint Surg Am, 2014. **96**(13): p. e107.
405. Fu, T.S., et al., *Enhancement of posterolateral lumbar spine fusion using low-dose rhBMP-2 and cultured marrow stromal cells*. Journal of orthopaedic research : official publication of the Orthopaedic Research Society, 2009. **27**(3): p. 380-4.

406. Gressot, L.V., et al., *Rh-BMP-2 for L5-S1 arthrodesis in long fusions to the pelvis for neuromuscular spinal deformity in the pediatric age group: analysis of 11 patients*. Child's nervous system : ChNS : official journal of the International Society for Pediatric Neurosurgery, 2014. **30**(2): p. 249-55.
407. Park, S.B., et al., *BMP-2 induced early bone formation in spine fusion using rat ovariectomy osteoporosis model*. The spine journal : official journal of the North American Spine Society, 2013. **13**(10): p. 1273-80.
408. Namikawa, T., et al., *Enhancing effects of a prostaglandin EP4 receptor agonist on recombinant human bone morphogenetic protein-2 mediated spine fusion in a rabbit model*. Spine, 2007. **32**(21): p. 2294-9.
409. Minamide, A., et al., *The effects of bone morphogenetic protein and basic fibroblast growth factor on cultured mesenchymal stem cells for spine fusion*. Spine, 2007. **32**(10): p. 1067-71.
410. Alden, T.D., et al., *Bone morphogenetic protein gene therapy for the induction of spinal arthrodesis*. Neurosurgical focus, 1998. **4**(2): p. e12.
411. Alden, T.D., et al., *Percutaneous spinal fusion using bone morphogenetic protein-2 gene therapy*. Journal of neurosurgery, 1999. **90**(1 Suppl): p. 109-14.
412. Miyazaki, M., et al., *Comparison of human mesenchymal stem cells derived from adipose tissue and bone marrow for ex vivo gene therapy in rat spinal fusion model*. Spine, 2008. **33**(8): p. 863-9.
413. Miyazaki, M., et al., *The effects of lentiviral gene therapy with bone morphogenetic protein-2-producing bone marrow cells on spinal fusion in rats*. Journal of spinal disorders & techniques, 2008. **21**(5): p. 372-9.
414. Miyazaki, M., et al., *Comparison of lentiviral and adenoviral gene therapy for spinal fusion in rats*. Spine, 2008. **33**(13): p. 1410-7.
415. Hasharoni, A., et al., *Murine spinal fusion induced by engineered mesenchymal stem cells that conditionally express bone morphogenetic protein-2*. Journal of neurosurgery. Spine, 2005. **3**(1): p. 47-52.
416. Wang, J.C., et al., *Effect of regional gene therapy with bone morphogenetic protein-2-producing bone marrow cells on spinal fusion in rats*. The Journal of bone and joint surgery. American volume, 2003. **85-A**(5): p. 905-11.
417. Riew, K.D., et al., *Thoracoscopic intradiscal spine fusion using a minimally invasive gene-therapy technique*. The Journal of bone and joint surgery. American volume, 2003. **85-A**(5): p. 866-71.
418. Riew, K.D., et al., *Induction of bone formation using a recombinant adenoviral vector carrying the human BMP-2 gene in a rabbit spinal fusion model*. Calcified tissue international, 1998. **63**(4): p. 357-60.
419. Lee, T.C., et al., *Bone morphogenetic protein gene therapy using a fibrin scaffold for a rabbit spinal-fusion experiment*. Neurosurgery, 2006. **58**(2): p. 373-80; discussion 373-80.
420. Smucker, J.D., et al., *B2A peptide on ceramic granules enhance posterolateral spinal fusion in rabbits compared with autograft*. Spine (Phila Pa 1976), 2008. **33**(12): p. 1324-9.
421. Cunningham, B.W., et al., *Ceramic granules enhanced with B2A peptide for lumbar interbody spine fusion: an experimental study using an instrumented model in sheep*. J Neurosurg Spine, 2009. **10**(4): p. 300-7.
422. Sardar, Z., et al., *Twelve-month results of a multicenter, blinded, pilot study of a novel peptide (B2A) in promoting lumbar spine fusion*. J Neurosurg Spine, 2015. **22**(4): p. 358-66.
423. Cheng, J.C., et al., *How does recombinant human bone morphogenetic protein-4 enhance posterior spinal fusion?* Spine, 2002. **27**(5): p. 467-74.
424. Guo, X., et al., *Recombinant human bone morphogenetic protein-4 (rhBMP-4) enhanced posterior spinal fusion without decortication*. Journal of orthopaedic research : official publication of the Orthopaedic Research Society, 2002. **20**(4): p. 740-6.
425. Zhao, J., et al., *Promoting lumbar spinal fusion by adenovirus-mediated bone morphogenetic protein-4 gene therapy*. Chin J Traumatol, 2007. **10**(2): p. 72-6.
426. Valdes, M., et al., *rhBMP-6 stimulated osteoprogenitor cells enhance posterolateral spinal fusion in the New Zealand white rabbit*. The spine journal : official journal of the North American Spine Society, 2007. **7**(3): p. 318-25.
427. Laurent, J.J., et al., *The use of bone morphogenetic protein-6 gene therapy for percutaneous spinal fusion in rabbits*. J Neurosurg Spine, 2004. **1**(1): p. 90-4.
428. Lu, J., et al., *Posterolateral intertransverse spinal fusion possible in osteoporotic rats with BMP-7 in a higher dose delivered on a composite carrier*. Spine, 2008. **33**(3): p. 242-9.



429. Vaccaro, A.R., D.G. Anderson, and C.A. Toth, *Recombinant human osteogenic protein-1 (bone morphogenetic protein-7) as an osteoinductive agent in spinal fusion*. Spine, 2002. **27**(16 Suppl 1): p. S59-65.
430. Salamon, M.L., et al., *The effects of BMP-7 in a rat posterolateral intertransverse process fusion model*. Journal of spinal disorders & techniques, 2003. **16**(1): p. 90-5.
431. Jenis, L.G., et al., *The effect of osteogenic protein-1 in instrumented and noninstrumented posterolateral fusion in rabbits*. The spine journal : official journal of the North American Spine Society, 2002. **2**(3): p. 173-8.
432. Mermer, M.J., et al., *Efficacy of osteogenic protein-1 in a challenging multilevel fusion model*. Spine, 2004. **29**(3): p. 249-56.
433. Delawi, D., et al., *A prospective, randomized, controlled, multicenter study of osteogenic protein-1 in instrumented posterolateral fusions: report on safety and feasibility*. Spine (Phila Pa 1976), 2010. **35**(12): p. 1185-91.
434. Furlan, J.C., et al., *Use of osteogenic protein-1 in patients at high risk for spinal pseudarthrosis: a prospective cohort study assessing safety, health-related quality of life, and radiographic fusion. Invited submission from the Joint Section on Disorders of the Spine and Peripheral Nerves, March 2007*. J Neurosurg Spine, 2007. **7**(5): p. 486-95.
435. Vaccaro, A.R., et al., *The safety and efficacy of OP-1 (rhBMP-7) as a replacement for iliac crest autograft for posterolateral lumbar arthrodesis: minimum 4-year follow-up of a pilot study*. Spine J, 2008. **8**(3): p. 457-65.
436. Kanayama, M., et al., *A prospective randomized study of posterolateral lumbar fusion using osteogenic protein-1 (OP-1) versus local autograft with ceramic bone substitute: emphasis of surgical exploration and histologic assessment*. Spine (Phila Pa 1976), 2006. **31**(10): p. 1067-74.
437. Vaccaro, A.R., et al., *Comparison of OP-1 Putty (rhBMP-7) to iliac crest autograft for posterolateral lumbar arthrodesis: a minimum 2-year follow-up pilot study*. Spine (Phila Pa 1976), 2005. **30**(24): p. 2709-16.
438. Vaccaro, A.R., et al., *A 2-year follow-up pilot study evaluating the safety and efficacy of op-1 putty (rhbmp-7) as an adjunct to iliac crest autograft in posterolateral lumbar fusions*. Eur Spine J, 2005. **14**(7): p. 623-9.
439. Vaccaro, A.R., et al., *A pilot study evaluating the safety and efficacy of OP-1 Putty (rhBMP-7) as a replacement for iliac crest autograft in posterolateral lumbar arthrodesis for degenerative spondylolisthesis*. Spine (Phila Pa 1976), 2004. **29**(17): p. 1885-92.
440. Vaccaro, A.R., et al., *A pilot safety and efficacy study of OP-1 putty (rhBMP-7) as an adjunct to iliac crest autograft in posterolateral lumbar fusions*. Eur Spine J, 2003. **12**(5): p. 495-500.
441. Taghavi, C.E., et al., *Bone morphogenetic protein binding peptide mechanism and enhancement of osteogenic protein-1 induced bone healing*. Spine, 2010. **35**(23): p. 2049-56.
442. Hidaka, C., et al., *Enhancement of spine fusion using combined gene therapy and tissue engineering BMP-7-expressing bone marrow cells and allograft bone*. Spine (Phila Pa 1976), 2003. **28**(18): p. 2049-57.
443. Helm, G.A., et al., *Use of bone morphogenetic protein-9 gene therapy to induce spinal arthrodesis in the rodent*. J Neurosurg, 2000. **92**(2 Suppl): p. 191-6.
444. Dumont, R.J., et al., *Ex vivo bone morphogenetic protein-9 gene therapy using human mesenchymal stem cells induces spinal fusion in rodents*. Neurosurgery, 2002. **51**(5): p. 1239-44; discussion 1244-5.
445. Baud'huin, M., et al., *A soluble bone morphogenetic protein type IA receptor increases bone mass and bone strength*. Proc Natl Acad Sci U S A, 2012. **109**(30): p. 12207-12.
446. Turgeman, G., et al., *Systemically administered rhBMP-2 promotes MSC activity and reverses bone and cartilage loss in osteopenic mice*. Journal of cellular biochemistry, 2002. **86**(3): p. 461-74.
447. Zerath, E., et al., *Effects of BMP-2 on osteoblastic cells and on skeletal growth and bone formation in unloaded rats*. Growth hormone & IGF research : official journal of the Growth Hormone Research Society and the International IGF Research Society, 1998. **8**(2): p. 141-9.
448. Dumic-Cule, I., et al., *Systemically available bone morphogenetic protein two and seven affect bone metabolism*. Int Orthop, 2014. **38**(9): p. 1979-85.
449. Kumar, S., T.R. Nagy, and S. Ponnazhagan, *Therapeutic potential of genetically modified adult stem cells for osteopenia*. Gene therapy, 2010. **17**(1): p. 105-16.

450. Kumar, S., et al., *Osteogenic differentiation of recombinant adeno-associated virus 2-transduced murine mesenchymal stem cells and development of an immunocompetent mouse model for ex vivo osteoporosis gene therapy*. Human gene therapy, 2004. **15**(12): p. 1197-206.
451. Hsiao, W.K., et al., *Intramarow bone morphogenetic protein 4 gene delivery improves local bone quality in femurs of ovariectomized rabbits*. J Periodontol, 2011. **82**(6): p. 854-62.
452. Zhang, X.S., et al., *Local ex vivo gene therapy with bone marrow stromal cells expressing human BMP4 promotes endosteal bone formation in mice*. J Gene Med, 2004. **6**(1): p. 4-15.
453. Simic, P., et al., *Systemically administered bone morphogenetic protein-6 restores bone in aged ovariectomized rats by increasing bone formation and suppressing bone resorption*. J Biol Chem, 2006. **281**(35): p. 25509-21.
454. Gonzalez, E.A., et al., *Treatment of a murine model of high-turnover renal osteodystrophy by exogenous BMP-7*. Kidney Int, 2002. **61**(4): p. 1322-31.
455. Shim, J.H., et al., *Administration of BMP2/7 in utero partially reverses Rubinstein-Taybi syndrome-like skeletal defects induced by Pdk1 or Cbp mutations in mice*. The Journal of clinical investigation, 2012. **122**(1): p. 91-106.
456. Kim, J.G., et al., *Enhancement of tendon-bone healing with the use of bone morphogenetic protein-2 inserted into the suture anchor hole in a rabbit patellar tendon model*. Cytotherapy, 2014. **16**(6): p. 857-67.
457. Ma, C.B., et al., *Bone morphogenetic proteins-signaling plays a role in tendon-to-bone healing: a study of rhBMP-2 and noggin*. Am J Sports Med, 2007. **35**(4): p. 597-604.
458. Rodeo, S.A., et al., *Use of recombinant human bone morphogenetic protein-2 to enhance tendon healing in a bone tunnel*. Am J Sports Med, 1999. **27**(4): p. 476-88.
459. Chen, C.H., et al., *Enhancement of rotator cuff tendon-bone healing with injectable periosteum progenitor cells-BMP-2 hydrogel in vivo*. Knee Surg Sports Traumatol Arthrosc, 2011. **19**(9): p. 1597-607.
460. Chen, C.H., et al., *Photoencapsulation of bone morphogenetic protein-2 and periosteal progenitor cells improve tendon graft healing in a bone tunnel*. Am J Sports Med, 2008. **36**(3): p. 461-73.
461. Martinek, V., et al., *Enhancement of tendon-bone integration of anterior cruciate ligament grafts with bone morphogenetic protein-2 gene transfer: a histological and biomechanical study*. J Bone Joint Surg Am, 2002. **84-A**(7): p. 1123-31.
462. Hoffmann, A., et al., *Neotendon formation induced by manipulation of the Smad8 signalling pathway in mesenchymal stem cells*. J Clin Invest, 2006. **116**(4): p. 940-52.
463. Wang, C.J., et al., *pCMV-BMP-2-transfected cell-mediated gene therapy in anterior cruciate ligament reconstruction in rabbits*. Arthroscopy, 2010. **26**(7): p. 968-76.
464. Coen, M.J., et al., *Lentiviral-based BMP4 in vivo gene transfer strategy increases pull-out tensile strength without an improvement in the osteointegration of the tendon graft in a rat model of biceps tenodesis*. J Gene Med, 2011. **13**(10): p. 511-21.
465. Aspenberg, P. and C. Forslund, *Bone morphogenetic proteins and tendon repair*. Scand J Med Sci Sports, 2000. **10**(6): p. 372-5.
466. Dines, J.S., et al., *The effect of growth differentiation factor-5-coated sutures on tendon repair in a rat model*. J Shoulder Elbow Surg, 2007. **16**(5 Suppl): p. S215-21.
467. Bolt, P., et al., *BMP-14 gene therapy increases tendon tensile strength in a rat model of Achilles tendon injury*. J Bone Joint Surg Am, 2007. **89**(6): p. 1315-20.
468. Lamplot, J.D., et al., *Distinct effects of platelet-rich plasma and BMP13 on rotator cuff tendon injury healing in a rat model*. Am J Sports Med, 2014. **42**(12): p. 2877-87.
469. Greiner, S., et al., *Local rhBMP-12 on an Absorbable Collagen Sponge as an Adjuvant Therapy for Rotator Cuff Repair - A Phase 1, Randomized, Standard of Care Control, Multicenter Study: Safety and Feasibility*. Am J Sports Med, 2015. **43**(8): p. 1994-2004.
470. Chamberlain, C.S., et al., *Effects of BMP-12-releasing sutures on Achilles tendon healing*. Tissue Eng Part A, 2015. **21**(5-6): p. 916-27.
471. Majewski, M., et al., *Ex vivo adenoviral transfer of bone morphogenetic protein 12 (BMP-12) cDNA improves Achilles tendon healing in a rat model*. Gene Ther, 2008. **15**(16): p. 1139-46.
472. Lories, R.J., I. Derese, and F.P. Luyten, *Modulation of bone morphogenetic protein signaling inhibits the onset and progression of ankylosing enthesitis*. J Clin Invest, 2005. **115**(6): p. 1571-9.
473. Tandon, A., et al., *BMP7 gene transfer via gold nanoparticles into stroma inhibits corneal fibrosis in vivo*. PLoS One, 2013. **8**(6): p. e66434.

474. Saika, S., et al., *Therapeutic effects of adenoviral gene transfer of bone morphogenetic protein-7 on a corneal alkali injury model in mice*. Lab Invest, 2005. **85**(4): p. 474-86.
475. Zhong, L., et al., *The anti-fibrotic effect of bone morphogenetic protein-7(BMP-7) on liver fibrosis*. Int J Med Sci, 2013. **10**(4): p. 441-50.
476. Wang, L.P., et al., *BMP-7 attenuates liver fibrosis via regulation of epidermal growth factor receptor*. Int J Clin Exp Pathol, 2014. **7**(7): p. 3537-47.
477. Kinoshita, K., et al., *Adenovirus-mediated expression of BMP-7 suppresses the development of liver fibrosis in rats*. Gut, 2007. **56**(5): p. 706-14.
478. Hao, Z.M., et al., *Oral administration of recombinant adeno-associated virus-mediated bone morphogenetic protein-7 suppresses CCl(4)-induced hepatic fibrosis in mice*. Mol Ther, 2012. **20**(11): p. 2043-51.
479. Saika, S., et al., *Adenoviral gene transfer of BMP-7, Id2, or Id3 suppresses injury-induced epithelial-to-mesenchymal transition of lens epithelium in mice*. Am J Physiol Cell Physiol, 2006. **290**(1): p. C282-9.
480. Myllarniemi, M., et al., *Gremlin-mediated decrease in bone morphogenetic protein signaling promotes pulmonary fibrosis*. Am J Respir Crit Care Med, 2008. **177**(3): p. 321-9.
481. Yang, G., et al., *Bone morphogenetic protein 7 attenuates epithelial-mesenchymal transition induced by silica*. Hum Exp Toxicol, 2016. **35**(1): p. 69-77.
482. Yang, Y.L., et al., *Bone morphogenetic protein-2 antagonizes renal interstitial fibrosis by promoting catabolism of type I transforming growth factor-beta receptors*. Endocrinology, 2009. **150**(2): p. 727-40.
483. Klahr, S. and J. Morrissey, *Obstructive nephropathy and renal fibrosis: The role of bone morphogenetic protein-7 and hepatocyte growth factor*. Kidney Int Suppl, 2003(87): p. S105-12.
484. Manson, S.R., et al., *The BMP-7-Smad1/5/8 pathway promotes kidney repair after obstruction induced renal injury*. J Urol, 2011. **185**(6 Suppl): p. 2523-30.
485. Manson, S.R., et al., *Endogenous BMP-7 is a critical molecular determinant of the reversibility of obstruction-induced renal injuries*. Am J Physiol Renal Physiol, 2011. **301**(6): p. F1293-302.
486. Vukicevic, S., et al., *Osteogenic protein-1 (bone morphogenetic protein-7) reduces severity of injury after ischemic acute renal failure in rat*. J Clin Invest, 1998. **102**(1): p. 202-14.
487. Zeisberg, M., et al., *Bone morphogenetic protein-7 inhibits progression of chronic renal fibrosis associated with two genetic mouse models*. Am J Physiol Renal Physiol, 2003. **285**(6): p. F1060-7.
488. Sugimoto, H., et al., *Renal fibrosis and glomerulosclerosis in a new mouse model of diabetic nephropathy and its regression by bone morphogenetic protein-7 and advanced glycation end product inhibitors*. Diabetes, 2007. **56**(7): p. 1825-33.
489. Li, R.X., et al., *BMP7 reduces inflammation and oxidative stress in diabetic tubulopathy*. Clin Sci (Lond), 2015. **128**(4): p. 269-80.
490. Zhen-Qiang, F., et al., *Localized expression of human BMP-7 by BM-MSCs enhances renal repair in an in vivo model of ischemia-reperfusion injury*. Genes Cells, 2012. **17**(1): p. 53-64.
491. Qi, R., W. Li, and S. Yu, *FK506 inhibits the mice glomerular mesangial cells proliferation by affecting the transforming growth factor-beta and Smads signal pathways*. Ren Fail, 2014. **36**(4): p. 589-92.
492. Zhang, Q., et al., *In vivo delivery of Gremlin siRNA plasmid reveals therapeutic potential against diabetic nephropathy by recovering bone morphogenetic protein-7*. PLoS One, 2010. **5**(7): p. e11709.
493. Liu, G.X., et al., *Smad7 inhibits AngII-mediated hypertensive nephropathy in a mouse model of hypertension*. Clin Sci (Lond), 2014. **127**(3): p. 195-208.
494. Sugimoto, H., et al., *Activin-like kinase 3 is important for kidney regeneration and reversal of fibrosis*. Nat Med, 2012. **18**(3): p. 396-404.
495. Manson, S.R., et al., *HDAC dependent transcriptional repression of Bmp-7 potentiates TGF-beta mediated renal fibrosis in obstructive uropathy*. J Urol, 2014. **191**(1): p. 242-52.
496. Cunha, S.I., et al., *Genetic and pharmacological targeting of activin receptor-like kinase 1 impairs tumor growth and angiogenesis*. J Exp Med, 2010. **207**(1): p. 85-100.
497. Bendell, J.C., et al., *Safety, pharmacokinetics, pharmacodynamics, and antitumor activity of dalantercept, an activin receptor-like kinase-1 ligand trap, in patients with advanced cancer*. Clin Cancer Res, 2014. **20**(2): p. 480-9.
498. Mitchell, D., et al., *ALK1-Fc inhibits multiple mediators of angiogenesis and suppresses tumor growth*. Mol Cancer Ther, 2010. **9**(2): p. 379-88.
499. Larrivee, B., et al., *ALK1 signaling inhibits angiogenesis by cooperating with the Notch pathway*. Dev Cell, 2012. **22**(3): p. 489-500.

500. Ricard, N., et al., *BMP9 and BMP10 are critical for postnatal retinal vascular remodeling*. Blood, 2012. **119**(25): p. 6162-71.
501. Wang, S., et al., *Up-regulation of BMP-2 antagonizes TGF-beta1/ROCK-enhanced cardiac fibrotic signalling through activation of Smurf1/Smad6 complex*. J Cell Mol Med, 2012. **16**(10): p. 2301-10.
502. Zeisberg, E.M., et al., *Endothelial-to-mesenchymal transition contributes to cardiac fibrosis*. Nat Med, 2007. **13**(8): p. 952-61.
503. Urbina, P. and D.K. Singla, *BMP-7 attenuates adverse cardiac remodeling mediated through M2 macrophages in prediabetic cardiomyopathy*. Am J Physiol Heart Circ Physiol, 2014. **307**(5): p. H762-72.
504. Wei, L.H., et al., *Smad7 inhibits angiotensin II-induced hypertensive cardiac remodelling*. Cardiovasc Res, 2013. **99**(4): p. 665-73.
505. Ebelt, H., et al., *Treatment with bone morphogenetic protein 2 limits infarct size after myocardial infarction in mice*. Shock, 2013. **39**(4): p. 353-60.
506. Sun, L., et al., *Bone morphogenetic protein-10 induces cardiomyocyte proliferation and improves cardiac function after myocardial infarction*. J Cell Biochem, 2014. **115**(11): p. 1868-76.
507. Pachori, A.S., et al., *Bone morphogenetic protein 4 mediates myocardial ischemic injury through JNK-dependent signaling pathway*. J Mol Cell Cardiol, 2010. **48**(6): p. 1255-65.
508. Ogura, Y., et al., *Therapeutic impact of follistatin-like 1 on myocardial ischemic injury in preclinical models*. Circulation, 2012. **126**(14): p. 1728-38.
509. Alfaro, M.P., et al., *sFRP2 suppression of bone morphogenetic protein (BMP) and Wnt signaling mediates mesenchymal stem cell (MSC) self-renewal promoting engraftment and myocardial repair*. J Biol Chem, 2010. **285**(46): p. 35645-53.
510. Reynolds, A.M., et al., *Targeted gene delivery of BMPR2 attenuates pulmonary hypertension*. Eur Respir J, 2012. **39**(2): p. 329-43.
511. Reynolds, A.M., et al., *Bone morphogenetic protein type 2 receptor gene therapy attenuates hypoxic pulmonary hypertension*. Am J Physiol Lung Cell Mol Physiol, 2007. **292**(5): p. L1182-92.
512. McMurtry, M.S., et al., *Overexpression of human bone morphogenetic protein receptor 2 does not ameliorate monocrotaline pulmonary arterial hypertension*. Am J Physiol Lung Cell Mol Physiol, 2007. **292**(4): p. L872-8.
513. Feng, F., R.L. Harper, and P.N. Reynolds, *BMPR2 gene delivery reduces mutation-related PAH and counteracts TGF-beta-mediated pulmonary cell signalling*. Respirology, 2015.
514. Long, L., et al., *Selective enhancement of endothelial BMPR-II with BMP9 reverses pulmonary arterial hypertension*. Nat Med, 2015. **21**(7): p. 777-85.
515. Long, L., et al., *Chloroquine prevents progression of experimental pulmonary hypertension via inhibition of autophagy and lysosomal bone morphogenetic protein type II receptor degradation*. Circ Res, 2013. **112**(8): p. 1159-70.
516. Spiekerkoetter, E., et al., *FK506 activates BMPR2, rescues endothelial dysfunction, and reverses pulmonary hypertension*. J Clin Invest, 2013. **123**(8): p. 3600-13.
517. Ciucan, L., et al., *Treatment with anti-gremlin 1 antibody ameliorates chronic hypoxia/SU5416-induced pulmonary arterial hypertension in mice*. Am J Pathol, 2013. **183**(5): p. 1461-73.
518. Brock, M., et al., *AntagomiR directed against miR-20a restores functional BMPR2 signalling and prevents vascular remodelling in hypoxia-induced pulmonary hypertension*. Eur Heart J, 2012.
519. Liu, Y., et al., *Serotonin induces Rho/ROCK-dependent activation of Smads 1/5/8 in pulmonary artery smooth muscle cells*. FASEB J, 2009. **23**(7): p. 2299-306.
520. Yang, J., et al., *Sildenafil potentiates bone morphogenetic protein signaling in pulmonary arterial smooth muscle cells and in experimental pulmonary hypertension*. Arterioscler Thromb Vasc Biol, 2013. **33**(1): p. 34-42.
521. Zhang, Y., et al., *Inhibition of bone morphogenetic protein 4 restores endothelial function in db/db diabetic mice*. Arterioscler Thromb Vasc Biol, 2014. **34**(1): p. 152-9.
522. Koga, M., et al., *The bone morphogenetic protein inhibitor, noggin, reduces glycemia and vascular inflammation in db/db mice*. Am J Physiol Heart Circ Physiol, 2013. **305**(5): p. H747-55.
523. Derwall, M., et al., *Inhibition of bone morphogenetic protein signaling reduces vascular calcification and atherosclerosis*. Arterioscler Thromb Vasc Biol, 2012. **32**(3): p. 613-22.
524. Malhotra, R., et al., *Inhibition of bone morphogenetic protein signal transduction prevents the medial vascular calcification associated with matrix Gla protein deficiency*. PLoS One, 2015. **10**(1): p. e0117098.

525. Kang, Y.H., et al., *Bone morphogenetic protein-7 inhibits vascular calcification induced by high vitamin D in mice*. *Tohoku J Exp Med*, 2010. **221**(4): p. 299-307.
526. Saeed, O., et al., *Pharmacological suppression of hepcidin increases macrophage cholesterol efflux and reduces foam cell formation and atherosclerosis*. *Arterioscler Thromb Vasc Biol*, 2012. **32**(2): p. 299-307.
527. Kajimoto, H., et al., *BMP type I receptor inhibition attenuates endothelial dysfunction in mice with chronic kidney disease*. *Kidney Int*, 2015. **87**(1): p. 128-36.
528. Park, S.S., et al., *Improvement of ovarian response and oocyte quality of aged female by administration of bone morphogenetic protein-6 in a mouse model*. *Reprod Biol Endocrinol*, 2012. **10**: p. 117.
529. Lee, W.S., et al., *Effect of bone morphogenetic protein-7 on folliculogenesis and ovulation in the rat*. *Biol Reprod*, 2001. **65**(4): p. 994-9.
530. McIntosh, C.J., et al., *Active immunization against the proregions of GDF9 or BMP15 alters ovulation rate and litter size in mice*. *Reproduction*, 2012. **143**(2): p. 195-201.
531. McNatty, K.P., et al., *The effects of immunizing sheep with different BMP15 or GDF9 peptide sequences on ovarian follicular activity and ovulation rate*. *Biol Reprod*, 2007. **76**(4): p. 552-60.
532. Juengel, J.L., et al., *Effects of immunization against bone morphogenetic protein 15 and growth differentiation factor 9 on ovulation rate, fertilization, and pregnancy in ewes*. *Biol Reprod*, 2004. **70**(3): p. 557-61.
533. Myllymaa, S., et al., *Inhibition of oocyte growth factors in vivo modulates ovarian folliculogenesis in neonatal and immature mice*. *Reproduction*, 2010. **139**(3): p. 587-98.
534. Jung, J.W., et al., *An Activin A/BMP2 chimera, AB215, blocks estrogen signaling via induction of ID proteins in breast cancer cells*. *BMC Cancer*, 2014. **14**: p. 549.
535. Ye, S., et al., *In vivo inhibition of bone morphogenetic protein-2 on breast cancer cell growth*. *Spine (Phila Pa 1976)*, 2013. **38**(3): p. E143-50.
536. Molina, C.A., et al., *Delayed onset of paralysis and slowed tumor growth following in situ placement of recombinant human bone morphogenetic protein 2 within spine tumors in a rat model of metastatic breast cancer*. *J Neurosurg Spine*, 2012. **16**(4): p. 365-72.
537. Buijs, J.T., et al., *The BMP2/7 heterodimer inhibits the human breast cancer stem cell subpopulation and bone metastases formation*. *Oncogene*, 2012. **31**(17): p. 2164-74.
538. Owens, P., et al., *Inhibition of BMP signaling suppresses metastasis in mammary cancer*. *Oncogene*, 2015. **34**(19): p. 2437-49.
539. Li, Q., et al., *Mesenchymal stem cells from human fat engineered to secrete BMP4 are nononcogenic, suppress brain cancer, and prolong survival*. *Clin Cancer Res*, 2014. **20**(9): p. 2375-87.
540. Ye, X.Y., et al., *Adenovirus mediated knockdown of bone morphogenetic protein 2 inhibits human lung cancer growth and invasion in vitro and in vivo*. *Int J Immunopathol Pharmacol*, 2012. **25**(4): p. 967-76.
541. Dai, J., et al., *Bone morphogenetic protein-6 promotes osteoblastic prostate cancer bone metastases through a dual mechanism*. *Cancer Res*, 2005. **65**(18): p. 8274-85.
542. Kobayashi, A., et al., *Bone morphogenetic protein 7 in dormancy and metastasis of prostate cancer stem-like cells in bone*. *J Exp Med*, 2011. **208**(13): p. 2641-55.
543. Lee, Y.C., et al., *BMP4 promotes prostate tumor growth in bone through osteogenesis*. *Cancer Res*, 2011. **71**(15): p. 5194-203.
544. Virk, M.S., et al., *Combined inhibition of the BMP pathway and the RANK-RANKL axis in a mixed lytic/blastic prostate cancer lesion*. *Bone*, 2011. **48**(3): p. 578-87.
545. Virk, M.S., et al., *Influence of simultaneous targeting of the bone morphogenetic protein pathway and RANK/RANKL axis in osteolytic prostate cancer lesion in bone*. *Bone*, 2009. **44**(1): p. 160-7.
546. Feeley, B.T., et al., *Overexpression of noggin inhibits BMP-mediated growth of osteolytic prostate cancer lesions*. *Bone*, 2006. **38**(2): p. 154-66.
547. Secondini, C., et al., *The role of the BMP signaling antagonist noggin in the development of prostate cancer osteolytic bone metastasis*. *PLoS One*, 2011. **6**(1): p. e16078.
548. Hawinkels, L.J., et al., *Activin Receptor-like Kinase 1 Ligand Trap Reduces Microvascular Density and Improves Chemotherapy Efficiency to Various Solid Tumors*. *Clin Cancer Res*, 2016. **22**(1): p. 96-106.
549. Dummula, K., et al., *Bone morphogenetic protein inhibition promotes neurological recovery after intraventricular hemorrhage*. *J Neurosci*, 2011. **31**(34): p. 12068-82.
550. Pei, H., et al., *Bone morphogenetic protein-7 ameliorates cerebral ischemia and reperfusion injury via inhibiting oxidative stress and neuronal apoptosis*. *Int J Mol Sci*, 2013. **14**(12): p. 23441-53.

551. Xu, J.H., et al., *Protective effects of recombinant human bone morphogenetic protein-7 on focal cerebral ischemia-reperfusion injury*. *Int J Neurosci*, 2013. **123**(6): p. 375-84.
552. Liu, Y., et al., *The effect of bone morphogenetic protein-7 (BMP-7) on functional recovery, local cerebral glucose utilization and blood flow after transient focal cerebral ischemia in rats*. *Brain Res*, 2001. **905**(1-2): p. 81-90.
553. Guan, J., et al., *Bone morphogenetic protein-7 (BMP-7) mediates ischemic preconditioning-induced ischemic tolerance via attenuating apoptosis in rat brain*. *Biochem Biophys Res Commun*, 2013. **441**(3): p. 560-6.
554. Heinonen, A.M., et al., *Neuroprotection by rAAV-mediated gene transfer of bone morphogenic protein 7*. *BMC Neurosci*, 2014. **15**: p. 38.
555. Shin, J.A., et al., *Noggin improves ischemic brain tissue repair and promotes alternative activation of microglia in mice*. *Brain Behav Immun*, 2014.
556. Ding, J., et al., *Effects of nerve growth factor and Noggin-modified bone marrow stromal cells on stroke in rats*. *J Neurosci Res*, 2011. **89**(2): p. 222-30.
557. Chen, C., Y. Cheng, and J. Chen, *Transfection of Noggin in bone marrow stromal cells (BMSCs) enhances BMSC-induced functional outcome after stroke in rats*. *J Neurosci Res*, 2011. **89**(8): p. 1194-202.
558. Sabo, J.K., et al., *Remyelination is altered by bone morphogenic protein signaling in demyelinated lesions*. *J Neurosci*, 2011. **31**(12): p. 4504-10.
559. Sabo, J.K., et al., *Investigation of sequential growth factor delivery during cuprizone challenge in mice aimed to enhance oligodendroglialogenesis and myelin repair*. *PLoS One*, 2013. **8**(5): p. e63415.
560. Hampton, D.W., et al., *A potential role for bone morphogenetic protein signalling in glial cell fate determination following adult central nervous system injury in vivo*. *Eur J Neurosci*, 2007. **26**(11): p. 3024-35.
561. Hampton, D.W., et al., *Spinally upregulated noggin suppresses axonal and dendritic plasticity following dorsal rhizotomy*. *Exp Neurol*, 2007. **204**(1): p. 366-79.
562. Matsuura, I., et al., *BMP inhibition enhances axonal growth and functional recovery after spinal cord injury*. *J Neurochem*, 2008. **105**(4): p. 1471-9.
563. Xiao, Q., et al., *Bone morphogenetic proteins mediate cellular response and, together with Noggin, regulate astrocyte differentiation after spinal cord injury*. *Exp Neurol*, 2010. **221**(2): p. 353-66.
564. Setoguchi, T., et al., *Treatment of spinal cord injury by transplantation of fetal neural precursor cells engineered to express BMP inhibitor*. *Exp Neurol*, 2004. **189**(1): p. 33-44.
565. Li, Z., et al., *Bone morphogenetic protein 4 inhibits liposaccharide-induced inflammation in the airway*. *Eur J Immunol*, 2014. **44**(11): p. 3283-94.
566. Wang, L., et al., *The bone morphogenetic protein-hepcidin axis as a therapeutic target in inflammatory bowel disease*. *Inflamm Bowel Dis*, 2012. **18**(1): p. 112-9.
567. Maric, I., et al., *Bone morphogenetic protein-7 reduces the severity of colon tissue damage and accelerates the healing of inflammatory bowel disease in rats*. *J Cell Physiol*, 2003. **196**(2): p. 258-64.
568. Maric, I., et al., *BMP signaling in rats with TNBS-induced colitis following BMP7 therapy*. *Am J Physiol Gastrointest Liver Physiol*, 2012. **302**(10): p. G1151-62.
569. Steinbicker, A.U., et al., *Inhibition of bone morphogenetic protein signaling attenuates anemia associated with inflammation*. *Blood*, 2011. **117**(18): p. 4915-23.
570. Andriopoulos, B., Jr., et al., *BMP6 is a key endogenous regulator of hepcidin expression and iron metabolism*. *Nat Genet*, 2009. **41**(4): p. 482-7.
571. Meynard, D., et al., *Regulation of TMPRSS6 by BMP6 and iron in human cells and mice*. *Blood*, 2011. **118**(3): p. 747-56.
572. Yu, P.B., et al., *Dorsomorphin inhibits BMP signals required for embryogenesis and iron metabolism*. *Nat Chem Biol*, 2008. **4**(1): p. 33-41.
573. Poli, M., et al., *Heparin: a potent inhibitor of hepcidin expression in vitro and in vivo*. *Blood*, 2011. **117**(3): p. 997-1004.
574. Theurl, I., et al., *Pharmacologic inhibition of hepcidin expression reverses anemia of chronic inflammation in rats*. *Blood*, 2011. **118**(18): p. 4977-84.
575. Babitt, J.L., et al., *Modulation of bone morphogenetic protein signaling in vivo regulates systemic iron balance*. *J Clin Invest*, 2007. **117**(7): p. 1933-9.
576. Tsugawa, D., et al., *Specific activin receptor-like kinase 3 inhibitors enhance liver regeneration*. *J Pharmacol Exp Ther*, 2014. **351**(3): p. 549-58.

577. Helbing, T., et al., *Inhibition of BMP activity protects epithelial barrier function in lung injury*. J Pathol, 2013. **231**(1): p. 105-16.
578. Shi, S., et al., *BMP antagonists enhance myogenic differentiation and ameliorate the dystrophic phenotype in a DMD mouse model*. Neurobiol Dis, 2011. **41**(2): p. 353-60.
579. Boon, M.R., et al., *BMP7 activates brown adipose tissue and reduces diet-induced obesity only at subthermoneutrality*. PLoS One, 2013. **8**(9): p. e74083.
580. Cao, Y., et al., *Noggin attenuates cerulein-induced acute pancreatitis and impaired autophagy*. Pancreas, 2013. **42**(2): p. 301-7.
581. Ueki, Y. and T.A. Reh, *Activation of BMP-Smad1/5/8 signaling promotes survival of retinal ganglion cells after damage in vivo*. PLoS One, 2012. **7**(6): p. e38690.
582. Yoon, B.H., et al., *Anti-wrinkle effect of bone morphogenetic protein receptor 1a-extracellular domain (BMPR1a-ECD)*. BMB Rep, 2013. **46**(9): p. 465-70.
583. Anderson, B.C., et al., *Sustained release of bone morphogenetic protein-4 in adult rabbit extraocular muscle results in decreased force and muscle size: potential for strabismus treatment*. Invest Ophthalmol Vis Sci, 2011. **52**(7): p. 4021-9.
584. Kihara, T., et al., *Acerogenin A, a natural compound isolated from Acer nikoense Maxim, stimulates osteoblast differentiation through bone morphogenetic protein action*. Biochem Biophys Res Commun, 2011. **406**(2): p. 211-7.
585. Li, X., et al., *Identification of upregulators of BMP2 expression via high-throughput screening of a synthetic and natural compound library*. J Biomol Screen, 2009. **14**(10): p. 1251-6.
586. Kong, X.H., et al., *Astragaloside II induces osteogenic activities of osteoblasts through the bone morphogenetic protein-2/MAPK and Smad1/5/8 pathways*. Int J Mol Med, 2012. **29**(6): p. 1090-8.
587. Lee, K.B., et al., *Bone morphogenetic protein-binding peptide reduces the inflammatory response to recombinant human bone morphogenetic protein-2 and recombinant human bone morphogenetic protein-7 in a rodent model of soft-tissue inflammation*. Spine J, 2011. **11**(6): p. 568-76.
588. Taghavi, C.E., et al., *Bone morphogenetic protein binding peptide mechanism and enhancement of osteogenic protein-1 induced bone healing*. Spine (Phila Pa 1976), 2010. **35**(23): p. 2049-56.
589. Dunmore, B.J., et al., *The lysosomal inhibitor, chloroquine, increases cell surface BMPR-II levels and restores BMP9 signalling in endothelial cells harbouring BMPR-II mutations*. Hum Mol Genet, 2013. **22**(18): p. 3667-79.
590. Munisso, M.C., et al., *Cilomilast enhances osteoblast differentiation of mesenchymal stem cells and bone formation induced by bone morphogenetic protein 2*. Biochimie, 2012. **94**(11): p. 2360-5.
591. Guo, H.F., et al., *Substituted benzothiophene or benzofuran derivatives as a novel class of bone morphogenetic protein-2 up-regulators: synthesis, structure-activity relationships, and preventive bone loss efficacies in senescence accelerated mice (SAMP6) and ovariectomized rats*. J Med Chem, 2010. **53**(4): p. 1819-29.
592. Lee, H.R., et al., *Discovery of a Small Molecule that Enhances Astrocytogenesis by Activation of STAT3, SMAD1/5/8, and ERK1/2 via Induction of Cytokines in Neural Stem Cells*. ACS Chem Neurosci, 2015.
593. Balaramnavar, V.M., et al., *Identification of novel 2-((1-(benzyl(2-hydroxy-2-phenylethyl)amino)-1-oxo-3-phenylpropan-2-yl)carbamoyl) benzoic acid analogues as BMP-2 stimulators*. J Med Chem, 2012. **55**(19): p. 8248-59.
594. Tang, C.H., et al., *Enhancement of bone morphogenetic protein-2 expression and bone formation by coumarin derivatives via p38 and ERK-dependent pathway in osteoblasts*. Eur J Pharmacol, 2008. **579**(1-3): p. 40-9.
595. Lee, S.Y., et al., *Combined effects of dentin sialoprotein and bone morphogenetic protein-2 on differentiation in human cementoblasts*. Cell Tissue Res, 2014. **357**(1): p. 119-32.
596. Uemura, T., et al., *Epinephrine accelerates osteoblastic differentiation by enhancing bone morphogenetic protein signaling through a cAMP/protein kinase A signaling pathway*. Bone, 2010. **47**(4): p. 756-65.
597. Matsumoto, Y., et al., *Estrogen facilitates osteoblast differentiation by upregulating bone morphogenetic protein-4 signaling*. Steroids, 2013. **78**(5): p. 513-20.
598. Lee, T.C., et al., *Bone morphogenetic protein-2 expression in spinal fusion masses enhanced by extracorporeal shock wave treatment: a rabbit experiment*. Acta Neurochir (Wien), 2010. **152**(10): p. 1779-84.

599. Kanazawa, I., et al., *Fasudil hydrochloride induces osteoblastic differentiation of stromal cell lines, C3H10T1/2 and ST2, via bone morphogenetic protein-2 expression*. *Endocr J*, 2010. **57**(5): p. 415-21.
600. Kanazawa, I., et al., *Activation of AMP kinase and inhibition of Rho kinase induce the mineralization of osteoblastic MC3T3-E1 cells through endothelial NOS and BMP-2 expression*. *Am J Physiol Endocrinol Metab*, 2009. **296**(1): p. E139-46.
601. Roedel, E.K., E. Schwarz, and S.M. Kanse, *The factor VII-activating protease (FSAP) enhances the activity of bone morphogenetic protein-2 (BMP-2)*. *J Biol Chem*, 2013. **288**(10): p. 7193-203.
602. Dai, J., et al., *Genistein promotion of osteogenic differentiation through BMP2/SMAD5/RUNX2 signaling*. *Int J Biol Sci*, 2013. **9**(10): p. 1089-98.
603. Yonezawa, T., et al., *Harmine promotes osteoblast differentiation through bone morphogenetic protein signaling*. *Biochem Biophys Res Commun*, 2011. **409**(2): p. 260-5.
604. Hu, N., et al., *Inhibition of histone deacetylases potentiates BMP9-induced osteogenic signaling in mouse mesenchymal stem cells*. *Cell Physiol Biochem*, 2013. **32**(2): p. 486-98.
605. Kuo, W.J., M.A. Digman, and A.D. Lander, *Heparan sulfate acts as a bone morphogenetic protein coreceptor by facilitating ligand-induced receptor hetero-oligomerization*. *Mol Biol Cell*, 2010. **21**(22): p. 4028-41.
606. Imai, Y., et al., *Hepatocyte growth factor contributes to fracture repair by upregulating the expression of BMP receptors*. *J Bone Miner Res*, 2005. **20**(10): p. 1723-30.
607. Joung, Y.H., et al., *Hwanggeumchal sorghum extract enhances BMP7 and GH signaling through the activation of Jak2/STAT5B in MC3T3E1 osteoblastic cells*. *Mol Med Rep*, 2013. **8**(3): p. 891-6.
608. Yao, Y., et al., *Heat shock protein 70 enhances vascular bone morphogenetic protein-4 signaling by binding matrix Gla protein*. *Circ Res*, 2009. **105**(6): p. 575-84.
609. Liang, W., et al., *Icariin promotes bone formation via the BMP-2/Smad4 signal transduction pathway in the hFOB 1.19 human osteoblastic cell line*. *Int J Mol Med*, 2012. **30**(4): p. 889-95.
610. Shi, S., et al., *Regulation of articular chondrocyte aggrecan and collagen gene expression by multiple growth factor gene transfer*. *J Orthop Res*, 2012. **30**(7): p. 1026-31.
611. Chen, L., et al., *Insulin-like growth factor 2 (IGF-2) potentiates BMP-9-induced osteogenic differentiation and bone formation*. *J Bone Miner Res*, 2010. **25**(11): p. 2447-59.
612. Kautz, L., et al., *Iron regulates phosphorylation of Smad1/5/8 and gene expression of Bmp6, Smad7, Id1, and Atoh8 in the mouse liver*. *Blood*, 2008. **112**(4): p. 1503-9.
613. Ellman, M.B., et al., *Lactoferricin enhances BMP7-stimulated anabolic pathways in intervertebral disc cells*. *Gene*, 2013. **524**(2): p. 282-91.
614. Zhang, C., et al., *Lactoferrin activates BMP7 gene expression through the mitogen-activated protein kinase ERK pathway in articular cartilage*. *Biochem Biophys Res Commun*, 2013. **431**(1): p. 31-5.
615. Kim, S.N., et al., *In vitro and in vivo osteogenic activity of licochalcone A*. *Amino Acids*, 2012. **42**(4): p. 1455-65.
616. Yang, Z., et al., *Low-intensity pulsed ultrasound induces osteogenic differentiation of human periodontal ligament cells through activation of bone morphogenetic protein-smad signaling*. *J Ultrasound Med*, 2014. **33**(5): p. 865-73.
617. Xue, H., et al., *Low-intensity pulsed ultrasound accelerates tooth movement via activation of the BMP-2 signaling pathway*. *PLoS One*, 2013. **8**(7): p. e68926.
618. Hou, C.H., S.M. Hou, and C.H. Tang, *Ultrasound increased BMP-2 expression via PI3K, Akt, c-Fos/c-Jun, and AP-1 pathways in cultured osteoblasts*. *J Cell Biochem*, 2009. **106**(1): p. 7-15.
619. Huang, W., et al., *Low-intensity pulsed ultrasound enhances bone morphogenetic protein expression of human mandibular fracture haematoma-derived cells*. *Int J Oral Maxillofac Surg*, 2015. **44**(7): p. 929-35.
620. Hirata, S., et al., *Low-level laser irradiation enhances BMP-induced osteoblast differentiation by stimulating the BMP/Smad signaling pathway*. *J Cell Biochem*, 2010. **111**(6): p. 1445-52.
621. Kodach, L.L., et al., *The effect of statins in colorectal cancer is mediated through the bone morphogenetic protein pathway*. *Gastroenterology*, 2007. **133**(4): p. 1272-81.
622. Nam, J., et al., *Dynamic regulation of bone morphogenetic proteins in engineered osteochondral constructs by biomechanical stimulation*. *Tissue Eng Part A*, 2013. **19**(5-6): p. 783-92.
623. Rath, B., et al., *Biomechanical forces exert anabolic effects on osteoblasts by activation of SMAD 1/5/8 through type 1 BMP receptor*. *Biorheology*, 2011. **48**(1): p. 37-48.
624. Balachandran, K., et al., *Elevated cyclic stretch induces aortic valve calcification in a bone morphogenetic protein-dependent manner*. *Am J Pathol*, 2010. **177**(1): p. 49-57.



625. Park, K.H., et al., *Melatonin promotes osteoblastic differentiation through the BMP/ERK/Wnt signaling pathways*. J Pineal Res, 2011. **51**(2): p. 187-94.
626. Hsu, Y.L., et al., *Myricetin induces human osteoblast differentiation through bone morphogenetic protein-2/p38 mitogen-activated protein kinase pathway*. Biochem Pharmacol, 2007. **73**(4): p. 504-14.
627. Miguel, B.S., et al., *N-methyl pyrrolidone as a potent bone morphogenetic protein enhancer for bone tissue regeneration*. Tissue Eng Part A, 2009. **15**(10): p. 2955-63.
628. Tan, T.W., et al., *CCN3 increases BMP-4 expression and bone mineralization in osteoblasts*. J Cell Physiol, 2012. **227**(6): p. 2531-41.
629. Nakagawa, K., et al., *Prostaglandin E2 EP4 agonist (ONO-4819) accelerates BMP-induced osteoblastic differentiation*. Bone, 2007. **41**(4): p. 543-8.
630. Tanaka, M., et al., *Prostaglandin E2 receptor (EP4) selective agonist (ONO-4819.CD) accelerates bone repair of femoral cortex after drill-hole injury associated with local upregulation of bone turnover in mature rats*. Bone, 2004. **34**(6): p. 940-8.
631. Yu, B., et al., *Parathyroid hormone induces differentiation of mesenchymal stromal/stem cells by enhancing bone morphogenetic protein signaling*. J Bone Miner Res, 2012. **27**(9): p. 2001-14.
632. Zhang, R., et al., *Transcriptional Regulation of BMP2 Expression by the PTH-CREB Signaling Pathway in Osteoblasts*. PloS one, 2011. **6**(6): p. e20780.
633. Nakao, Y., et al., *Parathyroid hormone enhances bone morphogenetic protein activity by increasing intracellular 3', 5'-cyclic adenosine monophosphate accumulation in osteoblastic MC3T3-E1 cells*. Bone, 2009. **44**(5): p. 872-7.
634. Park, K.W., et al., *The small molecule phenamil induces osteoblast differentiation and mineralization*. Mol Cell Biol, 2009. **29**(14): p. 3905-14.
635. Ying, X., et al., *Phosphoserine promotes osteogenic differentiation of human adipose stromal cells through bone morphogenetic protein signalling*. Cell Biol Int, 2014. **38**(3): p. 309-17.
636. Okada, M., et al., *Upregulation of intervertebral disc-cell matrix synthesis by pulsed electromagnetic field is mediated by bone morphogenetic proteins*. J Spinal Disord Tech, 2013. **26**(3): p. 167-73.
637. Jansen, J.H., et al., *Stimulation of osteogenic differentiation in human osteoprogenitor cells by pulsed electromagnetic fields: an in vitro study*. BMC Musculoskelet Disord, 2010. **11**: p. 188.
638. Schwartz, Z., et al., *Pulsed electromagnetic fields enhance BMP-2 dependent osteoblastic differentiation of human mesenchymal stem cells*. J Orthop Res, 2008. **26**(9): p. 1250-5.
639. Casarin, R.C., et al., *Resveratrol improves bone repair by modulation of bone morphogenetic proteins and osteopontin gene expression in rats*. Int J Oral Maxillofac Surg, 2014. **43**(7): p. 900-6.
640. Kuroyanagi, G., et al., *Resveratrol amplifies BMP-4-stimulated osteoprotegerin synthesis via p38 MAP kinase in osteoblasts*. Mol Med Rep, 2015. **12**(3): p. 3849-54.
641. Reiner, D.J., et al., *9-Cis retinoic acid protects against methamphetamine-induced neurotoxicity in nigrostriatal dopamine neurons*. Neurotox Res, 2014. **25**(3): p. 248-61.
642. Shen, H., et al., *9-Cis-retinoic acid reduces ischemic brain injury in rodents via bone morphogenetic protein*. J Neurosci Res, 2009. **87**(2): p. 545-55.
643. Karakida, T., et al., *Retinoic acid receptor gamma-dependent signaling cooperates with BMP2 to induce osteoblastic differentiation of C2C12 cells*. Connect Tissue Res, 2011. **52**(5): p. 365-72.
644. Moore, N.M., et al., *Synergistic enhancement of human bone marrow stromal cell proliferation and osteogenic differentiation on BMP-2-derived and RGD peptide concentration gradients*. Acta Biomater, 2011. **7**(5): p. 2091-100.
645. Chen, J.J., et al., *Salidroside stimulates osteoblast differentiation through BMP signaling pathway*. Food Chem Toxicol, 2013. **62**: p. 499-505.
646. Rondelet, B., et al., *Sildenafil added to sitaxsentan in overcirculation-induced pulmonary arterial hypertension*. Am J Physiol Heart Circ Physiol, 2010. **299**(4): p. H1118-23.
647. Yen, C.H., et al., *Sildenafil limits monocrotaline-induced pulmonary hypertension in rats through suppression of pulmonary vascular remodeling*. J Cardiovasc Pharmacol, 2010. **55**(6): p. 574-84.
648. Yang, L., et al., *Sildenafil increases connexin 40 in smooth muscle cells through activation of BMP pathways in pulmonary arterial hypertension*. Int J Clin Exp Pathol, 2014. **7**(8): p. 4674-84.
649. Ying, X., et al., *Silibinin promotes osteoblast differentiation of human bone marrow stromal cells via bone morphogenetic protein signaling*. Eur J Pharmacol, 2013. **721**(1-3): p. 225-30.
650. Zhang, H. and C.Y. Lin, *Simvastatin stimulates chondrogenic phenotype of intervertebral disc cells partially through BMP-2 pathway*. Spine (Phila Pa 1976), 2008. **33**(16): p. E525-31.

651. Bradley, J.D., et al., *Cyclooxygenase-2 inhibitor reduces simvastatin-induced bone morphogenetic protein-2 and bone formation in vivo*. J Periodontal Res, 2007. **42**(3): p. 267-73.
652. Song, C., et al., *Simvastatin induces osteoblastic differentiation and inhibits adipocytic differentiation in mouse bone marrow stromal cells*. Biochem Biophys Res Commun, 2003. **308**(3): p. 458-62.
653. Maeda, T., et al., *Simvastatin promotes osteoblast differentiation and mineralization in MC3T3-E1 cells*. Biochem Biophys Res Commun, 2001. **280**(3): p. 874-7.
654. Sugiyama, M., et al., *Compactin and simvastatin, but not pravastatin, induce bone morphogenetic protein-2 in human osteosarcoma cells*. Biochem Biophys Res Commun, 2000. **271**(3): p. 688-92.
655. Cao, Y., et al., *Selective small molecule compounds increase BMP-2 responsiveness by inhibiting Smurf1-mediated Smad1/5 degradation*. Sci Rep, 2014. **4**: p. 4965.
656. Kato, S., et al., *A synthetic compound that potentiates bone morphogenetic protein-2-induced transdifferentiation of myoblasts into the osteoblastic phenotype*. Mol Cell Biochem, 2011. **349**(1-2): p. 97-106.
657. Okada, M., et al., *Development and optimization of a cell-based assay for the selection of synthetic compounds that potentiate bone morphogenetic protein-2 activity*. Cell Biochem Funct, 2009. **27**(8): p. 526-34.
658. Hsu, Y.L., et al., *Syringetin, a flavonoid derivative in grape and wine, induces human osteoblast differentiation through bone morphogenetic protein-2/extracellular signal-regulated kinase 1/2 pathway*. Mol Nutr Food Res, 2009. **53**(11): p. 1452-61.
659. de Gorter, D.J., et al., *Biphasic effects of transforming growth factor beta on bone morphogenetic protein-induced osteoblast differentiation*. J Bone Miner Res, 2011. **26**(6): p. 1178-87.
660. Simmons, C.A., et al., *Dual growth factor delivery and controlled scaffold degradation enhance in vivo bone formation by transplanted bone marrow stromal cells*. Bone, 2004. **35**(2): p. 562-9.
661. Sun, S.X., et al., *BMP-2 and titanium particles synergistically activate osteoclast formation*. Braz J Med Biol Res, 2014. **47**(6): p. 461-9.
662. Xu, L., et al., *U0126 promotes osteogenesis of rat bone-marrow-derived mesenchymal stem cells by activating BMP/Smad signaling pathway*. Cell Tissue Res, 2015. **359**(2): p. 537-45.
663. Damrongsri, D., et al., *Cyclooxygenase-2 inhibition selectively attenuates bone morphogenetic protein-6 synthesis and bone formation during guided tissue regeneration in a rat model*. Clin Oral Implants Res, 2006. **17**(1): p. 38-47.
664. Song, T., et al., *Fibroblast growth factor 2 inhibits bone morphogenetic protein 9-induced osteogenic differentiation of mesenchymal stem cells by repressing Smads signaling and subsequently reducing Smads dependent up-regulation of ALK1 and ALK2*. Int J Biochem Cell Biol, 2013. **45**(8): p. 1639-46.
665. Wahdan-Alaswad, R.S., et al., *Insulin-like growth factor I suppresses bone morphogenetic protein signaling in prostate cancer cells by activating mTOR signaling*. Cancer Res, 2010. **70**(22): p. 9106-17.
666. Brock, M., et al., *Interleukin-6 modulates the expression of the bone morphogenic protein receptor type II through a novel STAT3-microRNA cluster 17/92 pathway*. Circ Res, 2009. **104**(10): p. 1184-91.
667. Huang, R.L., et al., *LPS-stimulated inflammatory environment inhibits BMP-2-induced osteoblastic differentiation through crosstalk between TLR4/MyD88/NF-kappaB and BMP/Smad signaling*. Stem Cells Dev, 2014. **23**(3): p. 277-89.
668. Kodama, A., et al., *Progesterone decreases bone morphogenetic protein (BMP) 7 expression and BMP7 inhibits decidualization and proliferation in endometrial stromal cells*. Hum Reprod, 2010. **25**(3): p. 751-6.
669. Mi, D., et al., *PTHrP inhibits BMP-6 expression through the PKA signaling pathway in breast cancer cells*. J Cancer Res Clin Oncol, 2011. **137**(2): p. 295-303.
670. Yeh, L.C., et al., *Rapamycin inhibits BMP-7-induced osteogenic and lipogenic marker expressions in fetal rat calvarial cells*. J Cell Biochem, 2013. **114**(8): p. 1760-71.
671. Sheng, N., et al., *Retinoic acid regulates bone morphogenic protein signal duration by promoting the degradation of phosphorylated Smad1*. Proc Natl Acad Sci U S A, 2010. **107**(44): p. 18886-91.
